1     **Indigenous *Bacillus paramycoides* and *Alcaligenes faecalis*: potential solution**  
2                                   **for the bioremediation of wastewaters**

3  
4  
5             Aneeba Rashid<sup>a,d</sup>, Safdar A. Mirza<sup>a</sup>, Ciara Keating<sup>b</sup>, Sikander Ali<sup>c</sup>, Luiza C. Campos<sup>d\*</sup>

6  
7     <sup>a</sup> Department of Botany, GC University Lahore, 54000, Pakistan

8     <sup>b</sup> Division of Infrastructure and Environment, James Watt School of Engineering, University of  
9     Glasgow, Glasgow G12 8LT, United Kingdom

10    <sup>c</sup> Institute of Industrial Biotechnology (IIB), GC University Lahore, 54000, Pakistan

11    <sup>d</sup> Department of Civil, Environmental and Geomatic Engineering, University College London,  
12    London, WC1E 6BT, United Kingdom

13    \*Corresponding author. Email address: [l.campos@ucl.ac.uk](mailto:l.campos@ucl.ac.uk) (L.C. Campos)

14

15

16

17

18

19

20

21

22

23

## Abstract

24 Farmers near towns and cities are using wide range of untreated wastewaters for crop irrigation in  
25 Pakistan due to severe freshwater shortage. The present study aimed to treat different types of wastewater  
26 including domestic, hospital, textile, pharmaceutical and mixed wastewaters using indigenous bacterial  
27 isolates to remove contaminants and render these wastewaters safer for irrigation. 37 bacterial strains were  
28 isolated from the 5 wastewater samples collected from different sites in Lahore, Pakistan. Under optimum  
29 growth conditions, the isolates D6, D7 and P1 showed maximum decolourisation potential of 96, 96, 93 %,  
30 respectively against hospital wastewater. GCMS analysis of the untreated hospital wastewater confirmed  
31 the presence of pharmaceutic pollutants i.e. Phenol, Salicylic acid, Caffeine, Naproxen, Octadecene and  
32 Diazepam. These organic compounds were biodegraded into derivate Ticlopidine in the case of isolate D6,  
33 derivatives Tetradecene and Griseofulvin in the case of isolate D7, and derivatives Lidocaine and Butalbital  
34 in the case of isolate P1. 16S rDNA sequencing was used to identify these isolates. Isolates D6 and D7  
35 showed 100 and 99.86 % homology to *Bacillus paramycoides*, a novel strain from *Bacillus cereus* group  
36 (Liu et al., 2017). Isolate P1 showed 97.47 % homology to *Alcaligenes faecalis*. These strains therefore  
37 could represent a low-cost and low-tech alternative to bioremediate complex wastewaters prior to irrigation  
38 to support the achievement of the Sustainable Development Goal 6 - clean water and sanitation in Pakistan.

39 **Keywords:** *Bacillus paramycoides*, *Alcaligenes faecalis*, wastewaters, biotreatment,  
40 bioremediation.

41

42

43

44

## 45 **1. Introduction**

46           The Planet Earth contains only less than 1% of freshwater (Gleick, 2014). The increasing  
47 population, urbanization, human activities and unjustifiable usage of freshwater are the foremost  
48 reasons of causing its further shortage (Khosro et al., 2015). The South Asian region, mainly  
49 Pakistan, has the worst condition in this scenario (Roberts, 2017; Wagan and Khoso, 2013).  
50 Despite having world's largest glaciers, researchers have proclaimed that the country is on its way  
51 to become the most water-stressed country in the region by year 2040 (WRI, 2015). The country's  
52 agricultural, domestic and industrial sectors have too scored high on the World's Resource  
53 Institute's water stress index. Its per capita annual water availability is just 1017 m<sup>3</sup> now (IMF,  
54 2015) which is scarily closer to the scarcity threshold level (1000 m<sup>3</sup>). Being an agricultural  
55 country, this scarcity of freshwater resources has driven local farmers in Pakistan to reuse untreated  
56 wastewater for irrigation of crops (Mahmood and Malik, 2014). These wastewaters contain many  
57 harmful chemicals and heavy metals which accumulate in crops (Afonne and Ifediba, 2020; Topal  
58 et al., 2020; Zhang et al., 2020; Zoqi and Doosti, 2020) and up the food chain making them  
59 hazardous for consumption.

60           Pakistan Water Sector Strategy (PWSS, 2002) reported that the total quantity of wastewater  
61 produced in Pakistan is 962335 million gal per annum including 674009 million gal from domestic  
62 and 288326 million gal from industrial use. The domestic and industrial wastewater is either  
63 discharged directly to a sewer system, a natural drain or water body, a nearby field or an internal  
64 septic tank in Pakistan (Murtaza and Zia, 2012). Generally, this wastewater is not treated and none  
65 of the cities have any biological treatment process except Islamabad and Karachi (EPMS, 2002),  
66 and even these cities treat only a small proportion (<8%) of their wastewater before disposal  
67 (Bashir, 2012; Steenbergen and Oliemans, 2002). These wastewaters contain considerable amount

68 of dyes, suspended solids, heavy metals, additives, detergents, surfactants, carcinogenic amines  
69 and formaldehyde (Azizullah et al., 2011). They also contain organic and inorganic particles and  
70 compounds, macro-solids, gases, emulsions, toxins, microplastics (Gatidou et al., 2019),  
71 pharmaceuticals like endocrine disrupting compounds, hormones, antibiotics, anesthetics,  
72 perfluorinated compounds (Arvaniti and Stasinakis, 2015), siloxanes (Bletsou et al., 2013), drugs  
73 of abuse (Gatidou et al., 2016) and various biological pathogens (Andersson et al., 2016). These  
74 untreated or insufficiently effluents treated wastewaters pose a serious environmental threat  
75 (Salgot et al., 2006). The complex nature of these effluents and lack of centralized wastewater  
76 treatment infrastructure make the treatment difficult in Pakistan. One area, that is a considerable  
77 challenge is the removal of colour contamination.

78         The dyes, impurities and chemicals released from the textile industries impart colour to  
79 wastewater drains and cause colour contamination, thus diminishing the water quality (Carmen  
80 and Daniela, 2012). Various physicochemical methods have been used worldwide to remove  
81 colour and impurities from wastewater, i.e. adsorption (Patel and Vashi, 2010), ion exchange  
82 (Karcher et al., 2002), membrane filtration (Marcucci et al., 2001), ozonation (Ince and Tezcanli,  
83 2001), photooxidation (Hai et al., 2007) and reverse osmosis (Suksaroj et al., 2005). Pakistan being  
84 a developing economy has not adopted any of these methods on a large scale as these methods are  
85 prohibitively expensive and require large complex infrastructure (Verma et al., 2012). Only one  
86 full scale domestic wastewater treatment plant was set up on the conventional activated sludge  
87 process in Islamabad, Pakistan but it is not maintained well by the plant operators (Fatima and  
88 Khan, 2012). Decentralised biological treatment methods could offer a potential low-cost and low-  
89 tech solution for communities in developing countries such as Pakistan.

90         Biological processes play a major role in the removal of pollutants. Due to ubiquitous nature

91 of bacteria, they can be used as invaluable tools for the biological treatment of different types of  
92 wastewater, i.e. domestic, hospital, pharmaceutical and textile industrial wastewaters. The  
93 bioremediation potential of bacterial isolates is an economically viable method and environment  
94 friendly thus presents a good alternative to other engineered process (Dwivedi and Tomar, 2018).  
95 Biological treatment takes advantage of the catabolic versatility of microorganisms including  
96 bacteria to degrade or convert toxic compounds to non-toxic compounds (Díaz, 2008). One  
97 strategy – to use native or indigenous isolates from wastewater to degrade, detoxify and decolour  
98 specific wastewater has been the source of intensive research. Many authors have isolated  
99 microorganisms from industrial textile wastewaters and then demonstrated their ability to  
100 decolourise specific classes of dyes in the laboratory (e.g. Zhang et al., 2010; Meerbergen et al.,  
101 2018; Alalewi and Jiang, 2012; Buthelezi et al., 2012; Mahmood et al., 2011). Shukor et al (2009)  
102 demonstrated isolates from hospital wastewater were capable of degrading acrylamide compounds.  
103 Others have used similar strategies to demonstrate the removal of heavy metals (Helmy et al.,  
104 2018; Afzal et al., 2017; Das and Kumari, 2016).

105         Researchers have established the identity of many of these isolates from different  
106 wastewaters and their ability to specific chemical compounds, e.g. *Bacillus cereus* isolated from  
107 domestic wastewater for degrading acrylamide (Shukor et al., 2009) and hydrocarbons (Kostka et  
108 al., 2011), *B. subtilis* isolated from pharmaceutical wastewater for removing antibiotic cephalixin  
109 and heavy metals (Adel et al., 2015), *Aeromonas hydrophila* isolated from industrial wastewater  
110 for degrading Triarylmethane dyes (Ogugbue and Sawidis, 2011), *Alcaligenes faecalis* spp.  
111 isolated from petrochemical industrial wastewater for degrading phenol (Manafi et al., 2011),  
112 *Rhodococcus pyridinivorans* isolated from gold mine wastewater for degrading cyanomethane  
113 (Sulistinah et al., 2019), *Dracaena sanderiana* isolated from plastic industry wastewater for

114 degrading bisphenol A (Suyamud et al., 2020) or *Sphingomonas trueperi* isolated from wastewater  
115 sludge for the degradation of allethrin (Bhatt et al., 2020). However, these biotreatment studies do  
116 not represent the complex environment of mixed wastewater. Moreover, isolates are generally  
117 tested against specific compounds in simplistic lab conditions and thus, the potential to degrade  
118 these compounds in complex raw wastewater is largely unknown. This therefore is not sufficient  
119 for the real-world situation in countries like Pakistan where wastewaters from household, hospitals  
120 and wide range of industries is combined.

121 The present research aimed to i) characterise the pollutants and metals in a variety of  
122 complex raw wastewaters in Pakistan, ii) isolate novel decolourising isolates from the raw  
123 wastewater, iii) determine the decolourisation and degradation potential of these isolates in raw  
124 hospital wastewater and finally iv) to identify the isolates with the maximum potential for  
125 decolourisation and degradation of organic compounds.

## 126 **2. Materials and methods**

### 127 *2.1 Collection of wastewaters*

128 Four wastewater (domestic, hospital, textile and pharmaceutical) samples (50 L each) from  
129 the points of discharge of drainage sites in Lahore, Pakistan were collected in sterile bottles  
130 according to the standard protocols (APHA, 2005). The geographical coordinates of Lahore city  
131 are 31° 34' 55.3620" north and 74° 19' 45.7536" east at an altitude of 217 m (712 ft). Mixed  
132 wastewater (50 L) was also collected from a collective drainage site of the different wastewaters.  
133 All five samples were collected in October, 2018. The temperature of the wastewaters and  
134 environment were measured on-site with the help of digital thermometer (HUBDIC).

### 135 *2.2 Characterisation of the wastewaters*

136 The wastewaters were analysed immediately after the collection for the characterisation to

137 ensure the bacterial viability and to avoid any self-degradation of organic compounds. Following  
138 physicochemical parameters were investigated according to standard protocols (APHA, 2005; Ali  
139 et al., 2009) *i.e.* colour, smell, temperature, pH, electrical conductivity (EC), total suspended solids  
140 (TSS), total dissolved solids (TDS), chemical oxygen demand (COD), biological oxygen demand  
141 ( $BOD_5$ ), salinity (ppt) and turbidity (NTU). The concentrations of heavy metals, *i.e.* Arsenic,  
142 Cadmium, Chromium, Lead and Nickel, were estimated through Atomic Absorption  
143 Spectrophotometer (AA 7000 F with Autosampler and Hydride Vapour Generator, Shimadzu,  
144 Japan). The same physicochemical parameters were investigated in treated wastewaters and were  
145 compared with untreated wastewaters. Biodegradability index (BI) is the ratio of  $BOD_5$  : COD. It  
146 is a parameter for evaluating the potential biodegradability of a biological treatment in wastewater  
147 (Padoley et al., 2012). The values of BI for all decolourised wastewaters were compared with the  
148 values of  $BOD_5$  : COD of the original wastewaters to access the level of biodegradability. The  
149 biodegradation of wastewaters with lesser  $BOD_5$  / COD value is not possible to biodegrade as it  
150 contains extremely toxic contaminants. If the  $BOD_5$  / COD value would be lower than 0.3, then  
151 the biodegradation will not proceed, thus it cannot be treated biologically, because the wastewater  
152 generated from these activities inhibits the metabolic activity of bacteria due to their toxicity.

### 153 *2.3 Isolation and screening of bacteria*

154 The isolation of bacterial strains from each of the five types of wastewaters was carried out  
155 through serial dilution method (Verma et al., 2001). The isolates from each wastewater's inocula  
156 were incubated on sterile nutrient agar medium (0.8% Nutrient broth and 2% Agar) plates in static  
157 incubator at 37°C for 24 hours and were then purified by streaking on nutrient agar medium plates.  
158 Streaking was done thrice in zig zag manner. The purified cultures were shifted to prepared slants  
159 of Luria-Bertani medium (LB) with Agar in test tubes and were preserved in a refrigerator (4 °C)

160 (Mahmood et al., 2011). The bacterial slants were maintained every two weeks on freshly prepared  
161 agar slants to circumvent the susceptibility of the isolates (ISO 11133, 2014).

162 The domestic wastewater was chosen as the preliminary testing sample for screening. The  
163 isolated bacterial strains were inoculated (10 %) and incubated at 37 °C for 24 hours in domestic  
164 wastewater (100 mL) for initial screening. The percentage decolourisation was measured using  
165 UV/VIS (AE-S80) spectrophotometer at 545 nm (Nanthakumar et al., 2013). The bacterial isolates  
166 showing more than 50% decolourisation were then tested and inoculated using the same  
167 methodology against each type of wastewater separately (D5, D6, D7, D8, H6, T4, T5, T6, P1, M5  
168 and M8). The bacterial isolates showing maximum decolourisation (more than 90%) against all  
169 wastewaters tested were further selected for testing optimal conditions (See supplementary data)  
170 for colour contamination removal in complex wastewaters.

#### 171 *2.4 Testing decolourisation potential of isolated bacteria*

172 The parameters incubation time, temperature and inoculum concentration were selected for  
173 the estimation of optimal growth conditions of three bacterial isolates for testing their  
174 decolourisation potential. For incubation time, the conical flasks (250 mL) containing 100 mL of  
175 domestic wastewater each were inoculated with the screened isolates (10 % inoculum) in shaking  
176 incubator at 120 rpm (PMI Labortechnik GMBH, WIS-20R) (Taran et al., 2007). The flasks were  
177 incubated for 24, 48, 72 and 96 hours at 37 °C. For testing the optimal temperature, the inoculum  
178 (10%) of screened isolates was added to domestic wastewater (100 mL) in conical flasks (250 mL)  
179 for 24 h. Flasks were incubated at 30, 37, 44, 51 and 58°C in a shaking incubator (PMI  
180 Labortechnik GMBH, WIS-20R). For the inoculum concentration, a loop full of bacterial colony  
181 from a plate was added in distilled water (100 mL). The optical density (OD) was adjusted to 1 at  
182 545 nm wavelength using UV/VIS spectrophotometer (A&E Labmed, AE-S80) in order to



183 maintain equal number of bacterial cells to each inoculum. The inoculum concentrations tested  
184 were 5, 10, 15, 20, 25 and 30 % (Getha et al., 1998). The bacterial cell count per mL of each  
185 screened isolate was also done through haemocytometer slide bridge (Neubaur improved HBG,  
186 Marinefield, Germany). On optimum inoculum concentration (10 %), optimum incubation time  
187 (48 h) and optimum temperature (37 and 51 °C), the decolourisation tests was conducted.

188 The three bacterial isolates were inoculated (10 %) separately in five types of wastewaters  
189 (100 mL each) present in conical flasks (250 mL) for 48 hours at 37 and 51 °C (Jadhav et al.,  
190 2010). The percentage decolourisation was calculated using Equation (1) (Cheriaa et al., 2012) at  
191 545 nm using UV/VIS (AE-S80) spectrophotometer:

$$192 \quad \text{Decolourisation percentage (\%)} = \frac{(A_0 - A)}{A_0} \times 100 \quad (1)$$

193 Where  $A_0$  = Initial absorbance,  $A$  = Absorbance of medium after decolourisation at the  $\lambda_{\text{max}}$  (nm).

194 The decolourisation experiments were performed in triplicates.

#### 195 *2.4.1 Organic compounds degradation*

196 Bioremediation potential of the hospital wastewater sample that showed maximum  
197 decolourisation percental and biodegradability index (Section 2.2 and 2.4) was further analysed  
198 for organic compounds degradation. The hospital wastewater sample was analyzed by gas  
199 chromatography mass spectrometry (GCMS) technique using an Agilent Gas Chromatograph (GC,  
200 AgiTech-7260) and Mass Spectrometer (MS, Maspec-6595). In total, four samples (10 mL each)  
201 were prepared for the analysis, *i.e.* one uninoculated hospital wastewater sample (control) and  
202 three inoculated (*i.e.* decolourised) hospital wastewater samples. The inoculated three samples  
203 were centrifuged (8000g for 15 min) to remove the biomass and the supernatants were shifted in  
204 polypropylene falcon tubes (15 mL). All the samples were acidified to pH 1–2 with concentrated  
205 HCl and then thoroughly extracted with three volumes of ethyl acetate. The organic layer was

206 collected, dewatered over anhydrous Na<sub>2</sub>SO<sub>4</sub> and filtered through Whatman filter paper (no. 54).

207 All the GC separations were accomplished using a 20 m×0.3 mm (as internal diameter) fused-

208 silica capillary column with a 0.45 μm coated 6% phenylmethyl silicone film in the instrument.

209 The aliquot of the sample (5 μL) was injected in split-less mode (0.5 min) at 290°C. The

210 oven temperature was set as follows: initial temperature (45°C), raised to 58-92°C/min and then

211 12-210°C/min, 10-285°C/min and 6-320°C/min with a hold time of 5 min. The pressure control

212 was adjusted for a constant electronic flow of helium as the carrier gas (mL/min). Mass

213 Spectrometer was adjusted as follows: 120°C analyzer, 210°C source, 280°C interface and electron

214 ionization at 80 eV. The data was collected from 50-450 atomic mass unit (amu). The retention

215 time (±0.1 min), quantification ions, confirmation ions (156.18 and 184.25 m/z) and internal

216 standards (Acenaphthene and Phenanthrene) of each sample were set at optimal levels (Spiking

217 level = 0.05 μg/g; recovery = 98.9 and 93.47 %; coefficient of variation (CV) = 4.22 and 7.39 %)

218 and run in accordance with the system sequence. The base-peak ion was employed for quantitation

219 and two qualifier ions were used for confirmation. The compound concentrations were compared

220 with internal standard quantitation (LoQ = 0.05 mg/kg) and calibration curves. In order to identify

221 the low molecular weight compounds derived from bacterial treatment, the mass spectra were

222 compared with National Institute of Standard and Technology (NIST) database library software

223 available in the instrument and by comparing the retention time with those of authentic compounds

224 available. Quantification of these compounds was conducted by relating the ratio of the peak area

225 of the compound of interest over the peak area of the internal standard (Acenaphthene and

226 Phenanthrene) to the calibration curve of standard solution.

### 227 *2.5 Metal tolerance limits*

228 100 mg/L solutions of following ten metal salts were prepared in deionized water, *i.e.*

229 PbNO<sub>3</sub>, CoCl<sub>2</sub>, CaCl<sub>2</sub>, ZnSO<sub>4</sub>, MnSO<sub>4</sub>, MgSO<sub>4</sub>, FeSO<sub>4</sub>, K<sub>2</sub>Cr<sub>2</sub>O<sub>7</sub>, Na<sub>2</sub>MoO<sub>4</sub> and CuSO<sub>4</sub> (Sigma  
230 Aldrich, Uk). The three bacterial isolates were streaked on the prepared metal salt-nutrient agar  
231 plates and kept in static incubator (at 37°C) for 24 h. At 100 mg/L concentration, the metal salt  
232 plates with more than 65% bacterial growth were selected. The solutions of these metal salts  
233 (CaCl<sub>2</sub>, MgSO<sub>4</sub>, K<sub>2</sub>Cr<sub>2</sub>O<sub>7</sub>, Na<sub>2</sub>MoO<sub>4</sub> and PbNO<sub>3</sub>) were then prepared in 50, 100, 150, 200, 250  
234 and 300 mg/L concentrations. The bacterial growth of three isolates on these concentrations was  
235 assessed.

### 236 *2.6 Identification of the bacterial isolates*

237 The three bacterial isolates showing > 90% decolourisation potential above were selected  
238 for identification through 16S rDNA sequencing (Mignard and Flandrois, 2006). Neat DNA (0.5  
239 mL) was sent to the Macrogen sequencing company in South Korea for sequencing analysis.  
240 Polymerase chain reaction (PCR) was carried on the three isolates using the following forward and  
241 reverse primer set (See supplementary data): 27F (AGA GTT TGA TCM TGG CTC AG) and  
242 1492R (TAC GGY TAC CTT GTT ACG ACT T) (Muyzer et al., 1993). 20 ng of genomic DNA  
243 template was taken in a 30 µL reaction mixture using *EF-Taq* (SolGent, Korea) as follows: *Taq*  
244 polymerase activation for 2 min at 95°C, 35 cycles for 1 min at 95°C, 1 min each at 55°C and 72°C  
245 were performed finishing with 10 min step at 72°C. Amplification products were purified with a  
246 multiscreen filter plate (Millipore Corporation, Bedford, Ma, USA). The sequencing reaction was  
247 performed using a PRISM BigDye Terminator v3.1 Cycle sequencing Kit. DNA samples  
248 containing the extension products were added to Hi-Di formamide (Applied Biosystems, Foster  
249 City, CA). The mixture was incubated for 5 min at 95°C, followed by 5 min on ice and then  
250 analyzed by ABI Prism 3730XL DNA analyzer (Applied Biosystems, Foster City, CA).

251 The forward and reverse sequence chromatograms (abi files) were initially viewed in

252 FinchTV version 1.5.0 and then interrogated using MacVector version 17.5.4. Raw sequences were  
253 examined in MacVector and ambiguous bases were edited by comparing the individual  
254 electrograms per strain. Low quality ends were trimmed. The forward and reverse reads were  
255 imported into BioEdit version 7.2. A consensus sequence per strain was subsequently assembled  
256 using the contig assembler program (CAP; Huang, 1992) using the forward read and reverse  
257 complement of the reverse read. The full sequence information and raw chromatogram details are  
258 presented in the Supplementary Information. BLAST analysis was carried out on the assembled  
259 sequences. The sequences of the three isolates were deposited in GenBank with accession  
260 numbers. Phylogenetic analysis of the strains was carried out using the top 20 BLAST hits for each  
261 isolate. This was achieved by aligning the sequences using Muscle version 3.8.425 (Edgar, 2004)  
262 and a phylogenetic tree assembled in Geneious Prime using Tamura-Nei genetic distance method  
263 and Neighbor-Joining tree building method. This tree was then imported in newick file format and  
264 edited in Evolview (Zhang et al., 2012).

### 265 **3. Results and discussion**

#### 266 *3.1 Characterisation of the wastewaters*

267 The apparent colours of domestic, hospital, textile, pharmaceutical and mixed wastewaters  
268 were light grey, light yellow, greenish grey, light brown and blackish, respectively. The true colour  
269 values for the wastewaters were 101, 188, 221, 103 and 311 PCU, respectively. The smell of the  
270 domestic, textile and mixed wastewaters was pungent, while hospital and pharmaceutical  
271 wastewaters had fishy smell. The values of most of the physicochemical parameters were beyond  
272 the level of National Environment Quality Standards (NEQS, 2000). Like the pH values of textile  
273 and pharmaceutical wastewater were 8.7 and 10.4, respectively, before treatment keeping in mind  
274 that the NEQS range for pH is 6.6-8.5. The pH values of domestic, hospital and mixed wastewaters

275 were within the NEQs range before treatment. This indicated that these wastewaters had their pH  
276 corrected before being discharged. Similarly, the values of total suspended solids of domestic,  
277 hospital, textile, pharmaceutical and mixed wastewaters were 1920, 2300, 2150, 2120 and 2670  
278 mg/L. These values were too beyond the range of NEQS standard (i.e. < 500 mg/L). The values  
279 for the turbidity should be less than 5 NTU as per NEQS range. While the turbidity values for  
280 domestic, hospital, textile, pharmaceutical and mixed wastewaters were 38, 51, 76, 61 and 123  
281 NTU (Nephelometric Turbidity Units), respectively.

282 The wastewaters became colourless and odourless after the biotreatment (Figure 1 a,b). The  
283 true colour values for domestic, hospital, textile, pharmaceutical and mixed wastewaters were  
284 reduced to 28, 55, 61, 38 and 64 PCU, respectively. Results showed that the values of analyses of  
285 various physicochemical parameters were within the levels of National Environment Quality  
286 Standards (NEQS, 2000) after treatment (Table 1). Like, the pH of textile and pharmaceutical  
287 wastewaters after the treatment were reduced to 7.5 and 8.2, respectively (pH range: 6.6-8.5). The  
288 reduction in pH after the decolourisation of textile wastewater has been reported previously by  
289 Ogugbue and Sawidis (2011b). Similarly, the values of total suspended solids (TSS) were reduced  
290 to 363, 483, 425, 398 and 491 mg/L after the biotreatment (TSS range: < 500 mg/L). The turbidity  
291 values were reduced after the biotreatment to 4, 5, 5, 3 and 4 which were within the range of NEQS  
292 turbidity value (i.e.  $\leq 5$  NTU).

293 The values of BOD<sub>5</sub> for domestic, hospital, textile, pharmaceutical and mixed wastewaters  
294 were 39, 78, 14, 68 and 40 mg/L, respectively. This was out of the range of NEQs which is 80 –  
295 250 mg/L. The values of COD for these wastewaters were 76, 260, 17, 133 and 99 mg/L,  
296 respectively. The value of COD in all wastewaters were below the range (150 – 400 mg/L) except  
297 hospital wastewater. The BOD<sub>5</sub> / COD ratio for these wastewaters were 0.51, 0.3, 0.82, 0.51 and

298 0.4, respectively. One important thing to notice is that if the value of  $BOD_5 / COD$  is in between  
299 0.3 and 0.6, then wastewater is required to treat it biologically, because the process would be  
300 relatively slow, as the acclimatization of the microorganisms that help in the degradation process  
301 takes time (Abdalla and Hammam, 2014). All of our wastewater samples lie in the same range  
302 between 0.3 and 0.6. However, the lowest value of this ratio recorded was of hospital wastewater  
303 that showed it was the most contaminated wastewater than all other types.

304 The values of  $BOD_5$  after the biotreatment of domestic, hospital, textile, pharmaceutical and  
305 mixed wastewaters were 176, 246, 174, 223 and 169 mg/L, respectively that were within the range  
306 of NEQs (80 – 250 mg/L). The values of COD for these wastewaters after biotreatment were 212,  
307 396, 153, 269 and 235 mg/L, respectively that were too within the range (150 – 400 mg/L). The  
308  $BOD_5 / COD$  ratio for these wastewaters were 0.83, 0.62, 1.14, 0.83 and 0.72, respectively. As per  
309 previously reported work, the value of  $BOD_5 / COD$  ration  $> 0.6$  confirms the biotreatment of  
310 wastewater (Abdalla and Hammam, 2014). All the values of biodegradability index in our  
311 wastewater samples were more than 0.6. Even the value of most contaminated hospital wastewater  
312 was also 0.62 that showed significant biodegradability index.

313 Heavy metal chromium was detected in the hospital (1.8 mg/L), pharmaceutical (1.7 mg/L)  
314 and mixed (0.9 mg/L) wastewaters which was exceeding the NEQs limit ( $< 0.05$  mg/L). Lead was  
315 only present in the hospital wastewater (0.17 mg/L). Nickel was present in domestic (0.08 mg/L),  
316 hospital (1.76 mg/L), textile (0.19 mg/L), pharmaceutical (1 mg/L) and mixed (0.5 mg/L)  
317 wastewaters (Table 1). The hospital wastewater seemed to have more heavy metals than all other  
318 types of wastewaters under study. After treatment, the chromium became absent in hospital  
319 wastewater. Its amount was reduced to the NEQ limit ( $< 0.05$  mg/L) in pharmaceutical (0.05  
320 mg/L) and mixed (0.019 mg/L) wastewaters after biotreatment (Table 1). Lead which was only

321 present in the hospital wastewater was not detected after biotreatment. The values of Nickel were  
322 reduced to 0.07, 0.25, 0.08, 0.5 and 0.22 after the biotreatment of domestic, hospital, textile,  
323 pharmaceutical and mixed wastewaters, respectively. Our results agree well with previous work.  
324 For example, Abo-Amer et al. (2015) and Naik et al., (2012) have reported the removal of heavy  
325 metals from sewage and electroplating wastewaters, respectively. Also, Ali et al. (2009) have  
326 reported reduction in colour, temperature, pH, EC, BOD<sub>5</sub>, COD, TSS, TDS and heavy metals ions  
327 present in textile wastewaters after the bioremediation by isolated bacteria.

### 328 *3.2 Isolation and screening of bacteria*

329 In total, 37 bacterial strains were isolated from domestic, hospital, textile, pharmaceutical  
330 and mixed wastewaters. Eight bacteria were isolated from the domestic wastewater (D1-D8), nine  
331 bacteria were isolated from the hospital wastewater (H1-H9), six from the textile wastewater (T1-  
332 T6), six from the pharmaceutical wastewater (P1-P6) and eight were isolated from the mixed  
333 wastewater (M1-M8). The isolations of bacteria have been reported from domestic (Jin et al.,  
334 2015), hospital (Yamina et al., 2014), textile (Alalewi and Jiang, 2012) and pharmaceutical  
335 (Madukasi et al., 2010) wastewaters. Meerbergen et al. (2018) isolated the bacterial isolates from  
336 textile wastewater to decolourise azo dyes. Similarly, four bacterial strains were isolated from  
337 marine and tannery saline wastewater samples that were proven to be salt-tolerant and carried out  
338 successful bioremediation (Sivaprakasam et al. 2008). Shomar et al. (2020) researched on the  
339 significance of using the isolated (viable) bacteria for wastewater treatments.

340 Eleven bacteria, isolated from domestic, hospital, textile, pharmaceutical and mixed  
341 wastewaters, had the potential to decolourise the preliminary tested domestic wastewater in  
342 comparison with other bacterial isolates under study. The percentage decolourisations of these  
343 bacterial strains isolated from domestic (D5, D6, D7 and D8), hospital (H6), textile (T4, T5, and

344 T6), pharmaceutical (P1) and mixed wastewaters (M5 and M8) were > 50% (Figure 2). After final  
345 screening, three bacterial strains showed more than 70% decolourisation potential against all  
346 wastewaters *i.e.* D6, D7 and P1 (Figure 3). The isolate D6 exhibited 71, 93, 70, 83 and 73 %  
347 decolourisation of domestic, hospital, textile, pharmaceutical and mixed wastewaters, respectively.  
348 The isolate D7 showed 74, 91, 70, 83 and 73 % decolourisation of domestic, hospital, textile,  
349 pharmaceutical and mixed wastewaters, respectively. The isolate P1 showed 82, 92, 71, 77 and 75  
350 % decolourisation of domestic, hospital, textile, pharmaceutical and mixed wastewaters,  
351 respectively. Chen et al. (2003) reported varied decolourisation capabilities (14 – 90 %) of six  
352 bacterial strains isolated from textile wastewater for azo, anthraquinone and indigoid dye groups.  
353 Meerbergen et al. (2018) reported > 80 % decolourisation potential of five bacterial strains isolated  
354 from domestic wastewater treatment plant to decolourise azo dyes. However, most of the work has  
355 been done on synthetic components of textile wastewaters (e.g. azo dyes) while our work has  
356 provided a complex combination and is more representative of the real-world scenario in Pakistan.

### 357 *3.3 Testing decolourisation potential of isolated bacteria*

358 The strain D6 exhibited 87, 96, 80, 93 and 83 % decolourisation of domestic, hospital,  
359 textile, pharmaceutical and mixed wastewaters, respectively. The strain D7 showed 84, 96, 88, 89  
360 and 83 % decolourisation of domestic, hospital, textile, pharmaceutical and mixed wastewaters,  
361 respectively. The strain P1 showed 89, 93, 81, 87 and 85 % decolourisation of domestic, hospital,  
362 textile, pharmaceutical and mixed wastewaters, respectively (Figure 4). The high decolourisation  
363 potential of 95-98 % have been reported previously in textile wastewater (Deng et al. 2008).  
364 Similarly, Saha et al. (2017), Modi et al. (2010), Kanagaraj et al. (2012) and Liao et al. (2013)  
365 have also worked on the decolourisation potential of bacterial isolates for textile wastewater.  
366 However, to our knowledge, this study has proven significant regarding the decolourisation and



367 bioremediation potential of these strains for pharmaceutical industrial, hospital, domestic and  
368 mixed wastewaters that are frequently discharged in Pakistan.

### 369 *3.3.1 Organic compounds degradation*

370 Considering the maximum decolourisation potential, fluctuating physicochemical values  
371 and significant biodegradability index value against bacterial isolates D6, D7 and P1, the untreated  
372 and decolourised samples of hospital wastewater were analyzed for degradation of organic  
373 compounds. GCMS analysis of untreated hospital wastewater confirmed the presence of six  
374 pharmaceutical pollutants in the effluent. These pollutants belonged to following different major  
375 groups: aromatic, metabolite, stimulant, NSAID, organic and sedative (Table 2). The pollutants  
376 belonging to these groups (with concentrations) were Phenol (0.876 ppm), Salicylic acid (0.048  
377 ppm), Caffeine (0.007 ppm), Naproxen (0.023 ppm), Octadecene (0.185 ppm) and Diazepam  
378 (0.014 ppm). The retention time (min) for these pollutants were 26.72, 6.51, 7.96, 9.16, 28.65 and  
379 38.06 minutes, respectively. The confirmation (m/z) ion for these pollutants were 58.15, 147.64,  
380 266.82, 412.07, 581.46 and 685.39 m/z, respectively (See supplementary data). Nair et al., (2008)  
381 have described the hazardous nature of phenolic pollutants even at relatively low concentration.  
382 Accumulation of phenol creates toxicity both for flora and fauna. Rodil et al., (2012) have reported  
383 that salicylic acid is one of the emerging most concentrated pollutant (exceeding the 1 µg/L) which  
384 is very hard to remove from the wastewaters even after biotreatment. Motuzas et al. (2017) have  
385 reported caffeine as an environmentally emerging micro-pollutant. The presence of non-steroidal  
386 anti-inflammatory drug (NSAID) like naproxen in the environment is an emerging problem due to  
387 their potential influence on human health and biocenosis or microbial communities  
388 (Wojcieszynska et al., 2014). Octadecene was found as an organic priority pollutant in Potato crop  
389 (concentration = 0.06 mg/kg; retention time = 21.12 minutes) that was irrigated with ground water

390 having pesticides and herbicides residues (Gushit et al., 2013). Rosal et al. (2010) reported  
391 diazepam as an emerging pollutant in urban wastewater with an average concentration of 3 ng/L  
392 (that equals LOQ).

393 In the hospital wastewater sample treated with bacterial isolate D6, all other four pollutants  
394 were completely biodegraded except salicylic acid and caffeine which were now present at very  
395 low concentrations (0.007 and 0.004 ppm) that showed their partial degradation leading to  
396 reduction in its concentration from its concentrations in untreated sample 0.048 and 0.007 ppm,  
397 respectively. However, a new intermediate compound Triclopidine belonging to Fibrinolytic group  
398 was found with 0.011 ppm concentration, 31.95 minutes retention time and 534.12 m/z  
399 confirmation ion. Previous researches have supported our ecofriendly biodegradation in this  
400 treated sample as Ticlopidine helps in prevention of stroke even better than Aspirin (Grotta et al.,  
401 1992). It is also helpful in coronary stenting and as antiplatelet agent during coronary interventions  
402 to cure the patients with acute myocardial infarction (AMI) (Cherian et al., 1998).

403 In the hospital wastewater sample treated with bacterial isolate D7, all other four pollutants  
404 were completely biodegraded except naproxen and octadecene which were now present at very  
405 low concentrations (0.006 and 0.019 ppm) that showed their partial degradation leading to  
406 reduction in its concentration from its concentrations in untreated sample 0.023 and 0.185 ppm,  
407 respectively. However, two new intermediate compounds Tetradecene and Griseofulvin belonging  
408 to organic and antibacterial groups were found present with 0.035 and 0.028 ppm concentrations,  
409 7.08 and 46.18 minutes retention times and 190.86 and 692.95 m/z confirmation ions. The  
410 formation of these essentially important compounds has been supported by previous researches.  
411 For example, Roth et al. (1959) reported the Griseofulvin as an antifungal and antibiotic. It is very  
412 interesting that a bacterial strain has helped in the formation of an antibiotic through degradation

413 of organic pollutants. Similarly, Tetradecene is a very important compound used in making  
414 polyalphaolefins (PAO) at a very low viscosity and excellent cold temperatures (Goze et al., 2007).

415 In the hospital wastewater sample treated with bacterial isolate P1, all other four pollutants  
416 were completely biodegraded except phenol and salicylic acid (0.381 and 0.015 ppm). However,  
417 two new intermediate compounds Lidocaine and Butalbital belonging to anesthetic and barbiturate  
418 groups were found present with 0.122 and 0.054 ppm concentrations, 20.26 and 30.88 minutes  
419 retention times and 368.27 and 625.51 m/z confirmation ions. Previously reported work has  
420 supported this biodegradation as an ecofriendly one. For example, Lidocaine is said to possess  
421 analgesic (Hollmann et al., 2000; Hollmann et al., 2005), antihyperalgesic (Nagy et al., 1996) and  
422 anti-inflammatory (Sugimoto et al., 2003) properties. It is also known to accelerate the return of  
423 bowel function after surgery (Marret et al., 2008). It is helpful for post-operative pain and acute  
424 rehabilitation after laparoscopic nephrectomy (Tauzin-Fin et al., 2014). Additionally, Butalbital is  
425 an analgesic usually prescribed for the treatment of migraine and tension-type headaches  
426 (Silberstein and McCrory, 2001). The maternal periconceptional use of butalbital also supports in  
427 healing congenital heart defects (Browne et al., 2013). However, its overuse causes headache and  
428 discontinuation syndromes (Devine et al., 2005).

### 429 *3.4 Metal tolerance limits*

430 At 100 mg/L concentration of metal salts of PbNO<sub>3</sub>, MgSO<sub>4</sub>, MnSO<sub>4</sub>, ZnSO<sub>4</sub>, K<sub>2</sub>Cr<sub>2</sub>O<sub>7</sub>,  
431 CaCl<sub>2</sub>, Na<sub>2</sub>MoO<sub>4</sub>, CuSO<sub>4</sub>, CoCl<sub>2</sub> and FeSO<sub>4</sub>, the isolate D6 exhibited growth of 25, 70, 50, 5, 35,  
432 80, 45, 20, 5 and 50 %, respectively. It showed maximum growth of 80 % against CaCl<sub>2</sub>. The  
433 isolate D7 indicated growth of 65, 35, 25, 12, 20, 35, 45, 3, 0 and 45%, respectively. It showed  
434 maximum growth of 65 % against PbNO<sub>3</sub>. The isolate P1 showed growth of 95, 65, 40, 15, 60, 75,

435 95, 20, 0 and 35 %, respectively. It showed maximum growth of 95 % against both PbNO<sub>3</sub> and  
436 Na<sub>2</sub>MoO<sub>4</sub> (Figure 5).

437 For isolate D6, CaCl<sub>2</sub> and MgSO<sub>4</sub> metal salts were selected that showed overall maximum  
438 growth of 78 and 70 % at 300mg/L concentrations, respectively. For isolate D7, PbNO<sub>3</sub> metal salt  
439 was selected that showed maximum growth of 82 % at 300mg/L concentration. For isolate P1,  
440 PbNO<sub>3</sub>, Na<sub>2</sub>MoO<sub>4</sub>, CaCl<sub>2</sub>, MgSO<sub>4</sub> and K<sub>2</sub>Cr<sub>2</sub>O<sub>7</sub> metal salts were selected that showed maximum  
441 growth of 65, 90, 73, 73 and 75 % at 300mg/L concentration of these metal salts, respectively  
442 (Figure 6 a,b,c). On one hand, this has confirmed that all three strains have the potential to tolerate  
443 these metals efficiently along with remediating the organic compounds from wastewaters even in  
444 co-existence with heavy metals. On the other hand, it also supported our results (Section 3.1) that  
445 these isolates have potential to adsorb the heavy metals to remove them from wastewaters. The  
446 high metals concentration is really a big challenge for wastewater treatments as it leads to the  
447 inhibition of the microbial populations etc. These strains were resistant to high metal  
448 concentrations and thus tolerated the harsh environments of these complex wastewaters.

### 449 *3.5 Identification of the bacterial isolates*

450 BLAST analysis indicated that strain D6 was a *Bacillus* species with 100% homology to  
451 *Bacillus paramycooides* (Table 3). Phylogenetic analysis reveals that it closely resembled *Bacillus*  
452 *pseudomycooides* (Figure 7) but formed a separate outgroup, indicating that the isolated species was  
453 phylogenetically distinct from the BLAST reference sequences. It was one of the nine novel  
454 species of the *Bacillus cereus* group reported by Liu et al. (2017). BLAST analysis indicated that  
455 strain D7 was also a *Bacillus* species with 99.86% homology to *Bacillus paramycooides* (Table 4).  
456 Phylogenetic analysis reveals that it closely resembled *Bacillus pseudomycooides* (Figure 8) but  
457 formed a separate outgroup, indicating that the isolated species was phylogenetically distinct from

458 the BLAST sequences. Thus, D6 and D7 isolates share a high similarity. BLAST analysis indicated  
459 that strain P1 was an *Alcaligenes* species with 97.47% homology to *Alcaligenes faecalis* (Table  
460 5). Phylogenetic analysis reveals that it closely resembled *Paenalcaligenes suuwonensis* and  
461 *Paenalcaligenes hominis* (Figure 9) but formed a separate outgroup, indicating that the isolated  
462 species was phylogenetically distinct from the BLAST sequences. The nucleotide sequences of  
463 these isolates D6, D7 and P1 have been submitted to GenBank under accession number [GenBank:  
464 MT477810], [GenBank: MT477812], and [GenBank: MT477813], respectively. The three isolates  
465 were then phylogenetically compared with each other and the top BLAST hit sequences. This  
466 result indicated that these isolates were more closely related to each other than the blast sequences.  
467 D6 and D7 clustered together demonstrating that these isolates were highly similar. The closest  
468 cluster was identified as *Paenalcaligenes suuwonensis* and *Paenalcaligenes hominis* (Figure 10).

469 Authors have previously found *Bacillus* species such as *Bacillus paramycooides* to be part of  
470 plant growth-promoting rhizobacteria (Osman and Yin, 2018) and associated with bioremediation  
471 of toxic effluents containing cyanide (Wu et al., 2014), alkylphenols (Chang et al., 2020) and  
472 hydrocarbons (Kostka et al., 2011). Similarly, *Alcaligenes faecalis* was also noted as a biocontrol  
473 agent by Yokoyama et al. (2013). It must be noted that both species are potential human pathogens  
474 (Bottone, 2010; Kaliaperumal et al., 2006). The potential pathogenicity of these isolates would  
475 warrant further investigation prior to any bioamendment strategies.

476 It is very important to highlight that the optimal incubation time for *B. paramycooides* has  
477 not been reported previously. For *A. faecalis* JBW4, isolated from activated sludge, the optimal  
478 incubation time was 5 days (Kong et al., 2013). In present study, these two strains have proven to  
479 be very efficient in terms of requiring less time of incubation (48 hours) with more decolourisation  
480 potential. The optimal temperature for growth of *Bacillus* spp. is reported between 30 – 37 °C

481 (Gilbert et al., 2009). *Alcaligenes faecalis* was previously reported to be grown at 37 °C (Schroll  
482 et al., 2001). Syed et al. (2015) have found heavy metal resistance and their degradation by *B.*  
483 *cereus* strains. *A. faecalis* was found to be heavy metal resistant bacteria isolated from sewage  
484 wastewater and responsible for the synthesis of silver nanoparticles (Abo-Amer et al., 2015). The  
485 capability of *A. faecalis* to degrade phenol as a carbon source has been previously reported  
486 (Rehfuss and Urban 2005). This supports our results showing biodegradation of phenol into other  
487 non-toxic low molecular organic compounds. *A. faecalis* has been proven to be efficient to  
488 bioremediate  $\epsilon$ -Caprolactam too from nylon-6 produced wastewater plant (Baxi and Shah 2002).  
489 But to the best of the authors knowledge, *B. paramycoides* have never been reported for any type  
490 of wastewater bioremediation. The antibiotic degradation potential of different isolated bacterial  
491 species from pharmaceutical wastewaters (Tahrani et al., 2015) and the biodegradation of  
492 acrylamide by *Enterobacter aerogenes* isolated from domestic wastewater (Buranasilp and  
493 Charoenpanich, 2011) has only been reported previously. Majorly, they looked at the individual  
494 wastewaters while our work has investigated a complex combination and is more representative  
495 of the real-world scenario in Pakistan.

#### 496 **4. Environmental implications**

497 Our work suggests that *B. paramycoides* D6, *B. paramycoides* D7 and *A. faecalis* are  
498 capable to bioremediate domestic, hospital, textile, pharmaceutical and mixed wastewaters under  
499 optimal conditions. These optimal conditions for temperature (37 and 51 °C) are achievable in  
500 Pakistan's arid climate (in temperate zone) and the incubation time is achieved in 48 h only. The  
501 utilization of these bacterial strains has several advantages as compared to the conventional  
502 methods such as physicochemical approaches for the removal of contaminants. Bacterial treatment  
503 with these strains is a cost-effective and low-tech method as the strains are isolated from the same

504 wastewater needed to be treated (Phugare et al., 2011). Further, these bacterial strains have been  
505 found here to be efficient for the biotreatment of a wide range of wastewaters, *i.e.* domestic,  
506 hospital, textile, pharmaceutical and mixed wastewaters. The strains degraded pharmaceutic  
507 pollutants into ecofriendly derivatives and showed high decolourisation potential. Thus, this work  
508 suggests that the biological treatment of wastewaters using *B. paramycoides* and *A. faecalis* can  
509 be an eco-friendly and efficient method which may help developing countries such as Pakistan to  
510 meet the Sustainable Development Goal of Clean Water and Sanitation (SDG-6). Future work may  
511 require to focus on scaling-up this methodology at commercial level and to form a consortium of  
512 these strains for achieving much higher efficiency.

## 513 **5. Conclusion**

514 Bacterial strains *B. paramycoides* D6, *B. paramycoides* D7 and *A. faecalis* have been proven  
515 to be efficient in terms of possessing bioremediation potential against different wastewaters, *i.e.*  
516 domestic, hospital, textile, pharmaceutical and mixed wastewaters. These bacterial isolates  
517 significantly biodegrade the pollutants from the wastewaters into non-toxic organic compounds  
518 within 48 hours of incubation, 10 % of inoculum and 37 and 51°C temperatures, respectively.  
519 Under these optimal growth conditions, the strains *B. paramycoides* D6, *B. paramycoides* D7 and  
520 *A. faecalis* showed maximum decolourisation potential of 96, 96, 93 %, respectively against  
521 hospital wastewater. GCMS analysis confirmed the biodegradation of pharmaceutic pollutants, *i.e.*  
522 Phenol, Salicylic acid, Caffeine, Naproxen, Octadecene and Diazepam, present in the hospital  
523 wastewater into Ticlopidine in the case of *B. paramycoides* D6, Tetradecene and Griseofulvin in  
524 the case of *B. paramycoides* D7 and Lidocaine and Butalbital in the case of *A. faecalis*. At 300  
525 mg/L concentration, *B. paramycoides* D6, showed overall maximum growth of 78 and 70 % for  
526 CaCl<sub>2</sub> and MgSO<sub>4</sub>, respectively; *B. paramycoides* D7 showed maximum growth of 82 % for

527 PbNO<sub>3</sub>; *Alcaligenes faecalis* showed maximum growth of 65, 90, 73, 73 and 75 % for PbNO<sub>3</sub>,  
528 Na<sub>2</sub>MoO<sub>4</sub>, CaCl<sub>2</sub>, MgSO<sub>4</sub> and K<sub>2</sub>Cr<sub>2</sub>O<sub>7</sub>, respectively. Our work recommends that the development  
529 of a consortium from these strains may prove more efficient source of bioremediation of  
530 wastewaters.

### 531 **Acknowledgements**

532 Authors acknowledge the Department of Botany and GC University Lahore for their  
533 continuous support throughout the research work.

### 534 **Funding**

535 Miss Aneeba Rashid has been supported by the 5000-Indigenous PhD Scholarship Program  
536 by Higher Education Commission, Pakistan.

### 537 **References**

538 Abdalla, K.Z., Hammam, G., 2014. Correlation between biochemical oxygen demand and  
539 chemical oxygen demand for various wastewater treatment plants in Egypt to obtain the  
540 biodegradability indices. International Journal of Sciences: Basic and Applied Research 13 (1),  
541 42-48.

542 Abo-Amer, A., El-Shanshoury, A.R.R., Alzahrani, O.M., 2015. Isolation and molecular  
543 characterization of heavy metal-resistant *A. faecalis* from sewage wastewater and synthesis of  
544 silver nanoparticles. Geomicrobiology Journal 32 (9), 836-845.  
545 <https://doi.org/10.1080/01490451.2015.1010754>.

546 Adel, A.S., Lalung, J., Efaq, A.N., Ismail, N., 2015. Removal of Cephalexin antibiotic and  
547 heavy metals from pharmaceutical effluents using *B. subtilis* Strain. Expert Opin. Environ. Biol. 4



548 (2), 1-9. <http://dx.doi.org/10.4172/2325-9655.1000117>.

549 Afonne, O.J., Ifediba, E.C., 2020. Heavy metals risks in plant foods – need to step up  
550 precautionary measures. *Current Opinion in Toxicology* 22 (1), 1-6.  
551 <https://doi.org/10.1016/j.cotox.2019.12.006>.

552 Afzal, A.M., Rasool, M.H., Waseem, M., Aslam, B., 2017. Assessment of heavy metal  
553 tolerance and biosorptive potential of *Klebsiella variicola* isolated from industrial effluents. *AMB*  
554 *Expr* 7 (184), 1-9. <https://doi.org/10.1186/s13568-017-0482-2>.

555 Alalewi, A., Jiang, C., 2012. Bacterial influence on textile wastewater decolourisation.  
556 *Journal of Environmental Protection* 3 (8), 889-903. <http://dx.doi.org/10.4236/jep.2012.328104>.

557 Ali, N., Hameed, A., Ahmed, S., 2009. Physicochemical characterization and  
558 bioremediation perspective of textile effluent, dyes and metals by indigenous bacteria. *Journal of*  
559 *Hazardous Materials* 164 (1), 322–328. <https://doi.org/10.1016/j.jhazmat.2008.08.006>.

560 Andersson, K., Rosemarin, A., Lamizana, B., Kvarnström, E., McConville, J., Seidu, R.,  
561 Dickin, S., Trimmer, C., 2016. Sanitation, wastewater management and sustainability: from waste  
562 disposal to resource recovery. Nairobi and Stockholm: United Nations Environment Programme  
563 and Stockholm Environment Institute, 56.

564 APHA, 2005. Standard methods for the examination of water and wastewater. 21<sup>st</sup> edition.  
565 American Public Health Association, Washington DC, USA.

566 Arvaniti, O.S., Stasinakis, A.S., 2015. Review on the occurrence, fate and removal of  
567 perfluorinated compounds during wastewater treatment. *Science of the Total Environment* 524-  
568 525, 81-92. <https://doi.org/10.1016/j.scitotenv.2015.04.023>.

569 Azizullah, A., Khattak, M.N.K., Richter, P., Hader, D.P., 2011. Water pollution in Pakistan  
570 and its impact on public health — A review. *Environment International* 37 (2), 479-497.

571 <https://doi.org/10.1016/j.envint.2010.10.007>.

572 Bashir, B.H., 2012. Wastewater treatment update (Pakistan). GMI municipal wastewater  
573 subcommittee meeting, Singapore, 2-3 July 2012. Global Methane Initiative.  
574 [https://globalmethane.org/documents/events\\_land\\_120702\\_msw\\_pakistan.pdf](https://globalmethane.org/documents/events_land_120702_msw_pakistan.pdf).

575 Baxi, N., Shah, A., 2002.  $\epsilon$ -Caprolactam-degradation by *A. faecalis* for bioremediation of  
576 wastewater of a nylon-6 production plant. Biotechnology Letters 24 (2002), 1177–1180.  
577 <https://doi.org/10.1023/A:1016187103682>.

578 Bhatt, P., Huang, Y., Rene, E.R., Kumar, A.J., Chen, S., 2020. Mechanism of allethrin  
579 biodegradation by a newly isolated *Sphingomonas trueperi* strain CW3 from wastewater sludge.  
580 Bioresource Technology 305, 123074. <https://doi.org/10.1016/j.biortech.2020.123074>.

581 Bletsou, A.A., Asimakopoulos, A.G., Stasinakis, A.S., Thomaidis, N.S., Kannan, K., 2013.  
582 Mass loading and fate of linear and cyclic siloxanes in a wastewater treatment plant in Greece.  
583 Environmental Science & Technology 47 (4), 1824-1832. <https://doi.org/10.1021/es304369b>.

584 Bottone, E.J., 2010. *Bacillus cereus*, a volatile human pathogen. Clinical microbiology  
585 reviews, 23(2), pp.382-398. <http://doi.org/10.1128/CMR.00073-09>.

586 Browne, M.L., Zutphen, A.R., Botto, L.D., Louik, C., Richardson, S., Drunschel, C.M.  
587 2013. Maternal butalbital use and selected defects in the national birth defects prevention study.  
588 Headache 54 (1), 54-66. <https://doi.org/10.1111/head.12203>.

589 Buranasilp, K., Charoenpanich, J., 2011. Biodegradation of acrylamide by *Enterobacter*  
590 *aerogenes* isolated from wastewater in Thailand. Journal of Environmental Sciences 23 (3), 396-  
591 403. [https://doi.org/10.1016/S1001-0742\(10\)60422-6](https://doi.org/10.1016/S1001-0742(10)60422-6).

592 Buthelezi, S.P., Olaniran, A.O., Pillay, B., 2012. Textile dye removal from wastewater  
593 effluents using biofloculants produced by indigenous bacterial isolates. Molecules 17 (1), 14260-

594 14274. <https://doi.org/10.3390/molecules171214260>.

595 Carmen, Z., Daniela, S., 2012. Textile organic dyes – characteristics, polluting effects and  
596 separation/elimination procedures from industrial effluents – A critical overview. Organic  
597 pollutants ten years after the stockholm convention - Environmental and analytical update, Dr.  
598 Tomasz Puzyn (Ed.), InTech. [http://www.intechopen.com/books/organic-pollutants-ten-](http://www.intechopen.com/books/organic-pollutants-ten-years-after-the-stockholm-convention-environmental-and-analytical-update/textile-organic-dyes-characteristics-polluting-effects-and-separation-elimination-procedures-from-in)  
599 [years-after-the-stockholm-convention-environmental-and-analytical-update/textile-organic-dyes-](http://www.intechopen.com/books/organic-pollutants-ten-years-after-the-stockholm-convention-environmental-and-analytical-update/textile-organic-dyes-characteristics-polluting-effects-and-separation-elimination-procedures-from-in)  
600 [characteristics-polluting-effects-and-separation-elimination-procedures-from-in](http://www.intechopen.com/books/organic-pollutants-ten-years-after-the-stockholm-convention-environmental-and-analytical-update/textile-organic-dyes-characteristics-polluting-effects-and-separation-elimination-procedures-from-in).

601 Chang, Y.C., Reddy, M.V., Umemoto, H., Kondo, S., Choi, D., 2020. Biodegradation of  
602 alkylphenols by rhizosphere microorganisms isolated from the roots of *Hosta undulata*. Journal of  
603 Environmental Chemical Engineering 8 (3), 103771. <https://doi.org/10.1016/j.jece.2020.103771>.

604 Chen, K., Wu, J., Liou, D., Hwang, S., 2003. Decolorization of the textile dyes by newly  
605 isolated bacterial strains. Journal of Biotechnology 101 (1), 57-68. [https://doi.org/10.1016/S0168-](https://doi.org/10.1016/S0168-1656(02)00303-6)  
606 [1656\(02\)00303-6](https://doi.org/10.1016/S0168-1656(02)00303-6).

607 Cheriaa, J., Khaireddine, M., Roubhia, M., Bakhrouf, A., 2012. Removal of  
608 triphenylmethane dyes by bacterial consortium. The Scientific World Journal 2012 (1): 1-9.  
609 <https://doi.org/10.1100/2012/512454>.

610 Cherian, S.M.D., FRACP, Michael, S.M.D., Aaron, K.M.D., Eliot, S.M.D., FSCAI, 1998.  
611 Primary stent implantation for acute myocardial infarction during pregnancy: Use of abciximab,  
612 ticlopidine, and aspirin. Catheterization and Cardiovascular Diagnosis 45 (3), 275-279.  
613 [https://doi.org/10.1002/\(SICI\)1097-0304\(199811\)45:3%3C275::AID-CCD13%3E3.0.CO;2-Q](https://doi.org/10.1002/(SICI)1097-0304(199811)45:3%3C275::AID-CCD13%3E3.0.CO;2-Q).

614 Das, M.P., Kumari, N., 2016. A microbial bioremediation approach: removal of heavy metal  
615 using isolated bacterial strains from industrial effluent disposal site. Int. J. Pharm. Sci. Rev. Res.  
616 38 (1), 111-114.

617 Deng, D., Guo, J., Zeng, G., Sun, G., 2008. Decolourisation of anthraquinone,  
618 triphenylmethane and azo dyes by a new isolated *B. cereus* strain DC11. International  
619 Biodeterioration & Biodegradation 62 (3), 263-269. <https://doi.org/10.1016/j.ibiod.2008.01.017>.

620 Devine, J.W., Farley, J.F., Hadsall, R.S., 2005. Patterns and predictors of prescription  
621 medication use in the management of headache: findings from the 2000 Medical Expenditure Panel  
622 Survey. Headache 45 (9), 1171-80. <https://doi.org/10.1111/j.1526-4610.2005.00240.x>.

623 Díaz, E., 2008. Genomic insights into the aerobic pathways for degradation of organic  
624 pollutants. *In*: McLeod, M.P., Eltis, L.D. (Ed.), Microbial Biodegradation: Genomics and  
625 Molecular Biology. 1<sup>st</sup> Edition. Caister Academic Press, Madrid, Spain, pp. 5-24.

626 Dwivedi, P., Tomar, R.S., 2018. Bioremediation of textile effluent for degradation and  
627 decolourisation of synthetic dyes: a review. International Journal of Current Research in Life  
628 Sciences 7 (4), 1948-1951. [https://doi.org/10.1007/3-540-26531-7\\_26](https://doi.org/10.1007/3-540-26531-7_26).

629 Edgar, R.C., 2004. MUSCLE: multiple sequence alignment with high accuracy and high  
630 throughput. Nucleic Acids Research 32, 1792-1797. <http://dx.doi.org/10.1093/nar/gkh340>.

631 Engineering, Planning and Management Consultants (EPMS), 2002. Master plan for urban  
632 wastewater (municipal and industrial) treatment facilities in Pakistan. Final report, Lahore.

633 Fatima, S.S., Khan, S.J., 2012. Evaluating the treatment performance of a full scale activated  
634 sludge plant in Islamabad, Pakistan. Water Practice and Technology 7 (1), 1-6.  
635 <https://doi.org/10.2166/wpt.2012.016>.

636 Gatidou, G., Arvaniti, O.S., Stasinakis, A.S., 2019. Review on the occurrence and fate of  
637 microplastics in sewage treatment plants. Journal of Hazardous Materials 367, 504-512.  
638 <https://doi.org/10.1016/j.jhazmat.2018.12.081>.

639 Gatidou, G., Kinyua, J., Nuijs, A.L.N., Gracia-Lor, E., Castiglioni, S., Covaci, A.,

640 Stasinakis, A.S., 2016. Drugs of abuse and alcohol consumption among different groups of  
641 population on the Greek island of Lesbos through sewage-based epidemiology. *Science of the*  
642 *Total Environment* 563-564, 633-640. <https://doi.org/10.1016/j.scitotenv.2016.04.130>.

643 Getha, K., Vikineswary, S., Chong, V., 1998. Isolation and growth of the phototrophic  
644 bacterium *Rhodospseudomonas palustris* strain B1 in sago-starch-processing wastewater. *World*  
645 *Journal of Microbiology and Biotechnology* 14 (1), 505–511.  
646 <https://doi.org/10.1023/A:1008855125634>.

647 Gilbert, R.J., Stringer, M.F., Peace, T.C., 2009. The survival and growth of *B. cereus* in  
648 boiled and fried rice in relation to outbreaks of food poisoning. *Epidemiology & Infection* 73 (3),  
649 433-444. <https://doi.org/10.1017/S0022172400042790>.

650 Gleick, P.H. 2014. *The World's water – The biennial report on fresh water resources*. 8<sup>th</sup>  
651 Edition. Island Press, pp: 218-219.

652 Goze, M.C.B., Nandapurkar, P.J., Yang, N., 2007. Low viscosity PAO based on 1-  
653 tetradecene. US7544850B2.

654 Grotta, J.C., Norris, J.W., Kamm, B., 1992. Prevention of stroke with ticlopidine: Who  
655 benefits most? *Neurology* 42 (1), <https://doi.org/10.1212/WNL.42.1.111>.

656 Gushit, J.S., Ekanem, E.O., Adamu, H.M., Chindo, I.Y., 2013. Analysis of herbicide  
657 residues and organic priority pollutants in selected root and leafy vegetable crops in Plateau state,  
658 Nigeria. *World Journal of Analytical Chemistry* 1 (2), 23-28. <https://doi.org/10.12691/wjac-1-2-2>.

659 Hai, F.I., Yamamoto, K., Fukushi, K., 2007. Hybrid treatment systems for dye wastewater.  
660 *Critical Reviews in Environmental Science and Technology* 37 (4), 315-377.  
661 <https://doi.org/10.1080/10643380601174723>.

662 Helmy, O.T., Abou-Taleb, K.A., Abdel-Monem, M.O., Abd El-salam, S.S., 2018. Isolation

663 and evaluation of the tolerance of industrial wastewater bacteria to heavy metals toxicity. AASCIT  
664 Journal of Biology 4(2), 25-34.

665 Hollmann, M.W., Strumper, D., Herroeder, S., Durieux, M.E., 2005. Receptors, G proteins,  
666 and their interactions. Anesthesiology 103 (5), 1066–78. [https://doi.org/10.1097/00000542-](https://doi.org/10.1097/00000542-200511000-00022)  
667 [200511000-00022](https://doi.org/10.1097/00000542-200511000-00022).

668 Hollmann, M.W., Durieux, M.E., 2000. Local anesthetics and the inflammatory response:  
669 A new therapeutic indication? Anesthesiology 93 (3), 858–75. [https://doi.org/10.1097/00000542-](https://doi.org/10.1097/00000542-200009000-00038)  
670 [200009000-00038](https://doi.org/10.1097/00000542-200009000-00038).

671 Huang, X., 1992. A contig assembly program based on sensitive detection of fragment  
672 overlaps. Genomics 14 (1), 18-25. [https://doi.org/10.1016/S0888-7543\(05\)80277-0](https://doi.org/10.1016/S0888-7543(05)80277-0).

673 IMF, 2015. Issues in managing water challenges and policy instruments: regional  
674 perspectives and case studies. International Monetary Fund, 1-22.  
675 <https://www.imf.org/external/pubs/ft/sdn/2015/sdn1511tn.pdf>.

676 Ince, N.H., Tezcanli, G., 2001. Reactive dyestuff degradation by combined sonolysis and  
677 ozonation. Dyes and Pigments 49 (3), 145-153. [https://doi.org/10.1016/S0143-7208\(01\)00019-5](https://doi.org/10.1016/S0143-7208(01)00019-5).

678 ISO 11133, 2014. Microbiology of food, animal feed and water – Preparation, production,  
679 storage and performance testing of culture media. 1<sup>st</sup> Edition.  
680 <https://www.iso.org/standard/53610.html>.

681 Jadhav, J.P., Phugare, S.S., Dhanve, R.S., Jadhav, S.B., 2010. Rapid biodegradation and  
682 decolorization of Direct Orange 39 (Orange TGLL) by an isolated bacterium *Pseudomonas*  
683 *aeruginosa* strain BCH. Biodegradation 21 (1), 453–463. [https://doi.org/10.1007/s10532-009-](https://doi.org/10.1007/s10532-009-9315-6)  
684 [9315-6](https://doi.org/10.1007/s10532-009-9315-6).

685 Jin, D., Kong, X., Li, Y., Bai, Z., Zhuang, G., Zhuang, X., Deng, Y., 2015. Biodegradation

686 of di-n-Butyl Phthalate by *Achromobacter* sp. isolated from rural domestic wastewater. *Int. J.*  
687 *Environ. Res. Public Health* 12 (1), 13510-13522. <https://doi.org/10.3390/ijerph121013510>.

688 Kaliaperumal, S., Srinivasan, R., Gupta, A., Parija, S.C., 2006. Postoperative  
689 endophthalmitis due to an unusual pathogen: *Alcaligenes faecalis*. *Eye* 20 (8), 968-969.  
690 <https://doi.org/10.1038/sj.eye.6702080>.

691 Kanagaraj, J., Senthil, V.T., Mandal, A.B., 2012. Biological method for decolourisation of  
692 an azo dye: clean technology to reduce pollution load in dye waste water. *Clean Techn Environ*  
693 *Policy* 14, 565–572. <https://doi.org/10.1007/s10098-011-0416-7>.

694 Karcher, S., Kornmüller, A., Jekel, M., 2002. Anion exchange resins for removal of reactive  
695 dyes from textile wastewaters. *Water Research* 36 (19), 4717-4724.  
696 [https://doi.org/10.1016/S0043-1354\(02\)00195-1](https://doi.org/10.1016/S0043-1354(02)00195-1).

697 Khoso, S., Wagan, F.H., Tunio, H.A., Ansari, A.A., 2015. An overview of the causes of  
698 water shortages in Pakistan, their causes, impacts and measures. *Journal of Applied Engineering*  
699 *Science* 13 (1), 35-44. <https://scindeks.ceon.rs/article.aspx?artid=1451-41171501035K>.

700 Kong, L., Zhu, S., Zhu, L., Xie, H., Su, K., Yan, T., Wang, J., Wang, J., Wang, F., Sun, F.,  
701 2013. Biodegradation of organochlorine pesticide endosulfan by bacterial strain *A. faecalis* JBW4.  
702 *Journal of Environmental Sciences* 25 (11), 2257-2264. [https://doi.org/10.1016/S1001-](https://doi.org/10.1016/S1001-0742(12)60288-5)  
703 [0742\(12\)60288-5](https://doi.org/10.1016/S1001-0742(12)60288-5).

704 Kostka, J.E., Prakash, O., Overholt, W.A., Green, S.J., Freyer, G., Canion, A., Delgardio,  
705 J., Norton, N., Hazen, T.C., Huettel, M., 2011. Hydrocarbon-degrading bacteria and the bacterial  
706 community response in Gulf of Mexico beach sands impacted by the Deepwater Horizon oil spill.  
707 *Appl. Environ. Microbiol.* 77 (22), 7962-7974. <http://doi.org/10.1128/AEM.05402-11>.

708 Liao, C., Hung, C., Chao, S., 2013. Decolourisation of azo dye reactive black B by *B. cereus*

709 strain HJ-1. Chemosphere 90 (7), 2109-2114. <https://doi.org/10.1016/j.chemosphere.2012.10.077>.

710 Liu, Y., Du, J., Lai, Q., Zeng, R., Ye, D., Xu, J., Shao, Z., 2017. Proposal of nine novel  
711 species of the *Bacillus cereus* group. International Journal of Systematic and Evolutionary  
712 Microbiology 67 (8), 2499-2508. <https://doi.org/10.1099/ijsem.0.001821>.

713 Madukasi, E.I., Dai, X., He, C., Zhou, J., 2010. Potentials of phototrophic bacteria in  
714 treating pharmaceutical wastewater. Int. J. Environ. Sci. Technol. 7 (1), 165–174.  
715 <https://doi.org/10.1007/BF03326128>.

716 Mahmood, A., Malik, R.N., 2014. Human health risk assessment of heavy metals via  
717 consumption of contaminated vegetables collected from different irrigation sources in Lahore,  
718 Pakistan. Arabian Journal of Chemistry 7 (1), 91-99. <https://doi.org/10.1016/j.arabjc.2013.07.002>.

719 Mahmood, S., Arshad, M., Khalid, A., Nazli, Z.H., Mahmood, T., 2011. Isolation and  
720 screening of azo dye decolorizing bacterial isolates from dye-contaminated textile wastewater. Soil  
721 Environ. 30(1), 7-12. <http://www.se.org.pk/File-Download.aspx?publishedid=23>.

722 Manafi, M., Mehrnia, M.R., Sarrafzadeh, M.H., 2011. Phenol removal from synthetic  
723 wastewater by *A. faecalis*: online monitoring. International Journal of Chemical and  
724 Environmental Engineering 2 (2), 104-107.

725 Marcucci, M., Nosenzo, G., Capannelli, G., Ciabatti, I., Corrieri, D., Ciardelli, G., 2001.  
726 Treatment and reuse of textile effluents based on new ultrafiltration and other membrane  
727 technologies. Desalination 138 (1–3), 75-82. [https://doi.org/10.1016/S0011-9164\(01\)00247-8](https://doi.org/10.1016/S0011-9164(01)00247-8).

728 Marret, E., Rolin, M., Beaussier, M., Bonnet, F., 2008. Meta-analysis of intravenous  
729 lidocaine and postoperative recovery after abdominal surgery. Br J Surg. 95 (11), 1331–8.  
730 <https://doi.org/10.1002/bjs.6375>.

731 Meerbergen, K., Willems, K.A., Dewil, R., Impe, J.V., Appels, L., Lievens, B., 2018.



732 Isolation and screening of bacterial isolates from wastewater treatment plants to decolorize azo  
733 dyes. *Journal of Bioscience and Bioengineering* 125 (4), 448-456.  
734 <https://doi.org/10.1016/j.jbiosc.2017.11.008>.

735 Mignard, S., Flandrois, J.P., 2006. 16S rRNA sequencing in routine bacterial identification:  
736 A 30-month experiment. *Journal of Microbiological Methods* 67 (1). 574–581.  
737 <https://doi.org/10.1016/j.mimet.2006.05.009>.

738 Modi, H.A., Rajput, G., Ambasana, C., 2010. Decolourisation of water-soluble azo dyes by  
739 bacterial cultures, isolated from dye house effluent. *Bioresource Technology* 101 (16), 6580-6583.  
740 <https://doi.org/10.1016/j.biortech.2010.03.067>.

741 Motuzas, J., Drobek, M., Martens, D.L., Vallicari, C., Julbe, A., Diniz da Costa, J.C., 2017.  
742 Environmental mineralization of caffeine micro-pollutant by Fe-MFI zeolites. *Environmental*  
743 *Science and Pollution Research* 25, 3628–3635. <https://doi.org/10.1007/s11356-017-0530-0>.

744 Murtaza, G., Zia, M.H., 2012. Wastewater production, treatment and use in Pakistan. Final  
745 country report. UN-Water Activity Information System.

746 Muyzer, G., de Waal, E.C., Uitterlinden, A.G., 1993. Profiling of complex microbial  
747 populations by denaturing gradient gel electrophoresis analysis of polymerase chain reaction-  
748 amplified genes coding for 16S rRNA. *Applied and Environmental Microbiology* 59 (3), 695-700.

749 Nagy, I., Woolf, C.J., 1996. Lignocaine selectively reduces C fibre-evoked neuronal activity  
750 in rat spinal cord in vitro by decreasing N-methyl-D-aspartate and neurokinin receptor-mediated  
751 post-synaptic depolarizations; implications for the development of novel centrally acting  
752 analgesics. *Pain* 64 (1), 59–70. [https://doi.org/10.1016/0304-3959\(95\)00072-0](https://doi.org/10.1016/0304-3959(95)00072-0).

753 Naik, U.C., Srivastava, S., Thakur, I.S., 2012. Isolation and characterization of *B. cereus*  
754 IST105 from electroplating effluent for detoxification of hexavalent chromium. *Environ Sci Pollut*

755 Res 19 (2012), 3005–3014. <https://doi.org/10.1007/s11356-012-0811-6>.

756 Nair, C.I., Jayachandran, K., Shashidhar, S., 2008. Biodegradation of phenol. African  
757 Journal of Biotechnology 7 (25), 4951-4958.

758 Nanthakumar, K., Karthikeyan, K., Suriyanarayanan, S., Lakshmanaperumalsamy, P.,  
759 2013. Application of Plackett–Burman design to optimize bioprocess variables for decolorization  
760 of Reactive Red 195 by a termite associated bacterial consortium BUTC7, *In*: Velu R (eds)  
761 Microbiological research in agroecosystem management. Springer, India  
762 [https://doi.org/10.1007/978-81-322-1087-0\\_3](https://doi.org/10.1007/978-81-322-1087-0_3).

763 National Environment Quality Standards (NEQS). 2000. The Gazette of Pakistan. Ministry  
764 of Environment, Local Government and Rural Development, Government of Pakistan, Islamabad,  
765 Pakistan, pp. 1289-1294.  
766 [http://epd.punjab.gov.pk/system/files/National\\_Environmental\\_Quality\\_Standards\\_for\\_Municipal  
767 and\\_Liquid\\_Industrial\\_Effulents.pdf](http://epd.punjab.gov.pk/system/files/National_Environmental_Quality_Standards_for_Municipal_and_Liquid_Industrial_Effulents.pdf).

768 Ogugbue, C.J., Sawidis, T., 2011. Bioremediation and detoxification of synthetic  
769 wastewater containing triarylmethane dyes by *Aeromonas hydrophila* isolated from industrial  
770 effluent. Biotechnology Research International 1, 1-11. <https://doi.org/10.4061/2011/967925>.

771 Ogugbue, C.J., Sawidis, T., 2011b. Optimisation of process parameters for bioreduction of  
772 azo dyes using *B. firmus* under batch anaerobic condition. International Journal of Environmental  
773 Studies 68 (5), 651-665. <https://doi.org/10.1080/00207233.2011.578353>.

774 Osman, N.I., Yin, S., 2018. Isolation and characterization of pea plant (*Pisum sativum* L.)  
775 growth-promoting Rhizobacteria. African Journal of Microbiology Research 12 (34), 820-828.  
776 <http://doi.org/10.5897/AJMR2018.8859>.

777 Padoley, K.V., Saharan, V.K., Mudliar, S.N., Pandey, R.A., Pandit, A.B., 2012.

778 Cavitationally induced biodegradability enhancement of a distillery wastewater. Journal of  
779 Hazardous Materials 219–220, 69-74. <https://doi.org/10.1016/j.jhazmat.2012.03.054>.

780 Pakistan Water Sector Strategy (PWSS), 2002. National water sector profile, 5. Ministry of  
781 Water and Power, Office of the Chief Engineering Advisor.  
782 <http://waterinfo.net.pk/cms/pdf/vol5.pdf>.

783 Patel, H., Vashi, R.T., 2010. Treatment of textile wastewater by adsorption and coagulation.  
784 Journal of Chemistry 7 (1), 1-9. <https://doi.org/10.1155/2010/987620>.

785 Phugare, S.S., Kalyani, D.C., Surwase, S.N., Jadhav, J.P., 2011. Ecofriendly degradation,  
786 decolourisation and detoxification of textile effluent by a developed bacterial consortium.  
787 Ecotoxicology and Environmental Safety 74 (5), 1288–96.  
788 <https://doi.org/10.1016/j.ecoenv.2011.03.003>.

789 Rehfuss, M., Urban, J., 2005. *A. faecalis* subsp. phenolicus subsp. nov. a phenol-degrading,  
790 denitrifying bacterium isolated from a graywater bio processor. Systematic and Applied  
791 Microbiology 28 (5), 421-429. <https://doi.org/10.1016/j.syapm.2005.03.003>.

792 Roberts, R., 2017. Pakistan could face mass droughts by 2025 as water level nears ‘absolute  
793 scarcity’. The Independent, UK. Retrieved from  
794 [https://www.independent.co.uk/news/world/pakistan-droughts-2025-warning-water-levels-](https://www.independent.co.uk/news/world/pakistan-droughts-2025-warning-water-levels-a7949226.html)  
795 [a7949226.html](https://www.independent.co.uk/news/world/pakistan-droughts-2025-warning-water-levels-a7949226.html).

796 Rodil, R., Quintana, J.B., Concha-Grana, E., Lopez-Mahia, P., Muniategui-Lorenzo, S.,  
797 Prada-Rodriguez, D., 2012. Emerging pollutants in sewage, surface and drinking water in Galicia  
798 (NW Spain). Chemosphere 86 (10), 1040-1049.  
799 <https://doi.org/10.1016/j.chemosphere.2011.11.053>.

800 Rosal, R., Rodriguez, A., Pergigon-Melon, J.A., Petre, A., Garcia-Calvo, E., Gomez, M.J.,

801 Aguera, A., Fernandez-Alba, A.R., 2010. Occurrence of emerging pollutants in urban wastewater  
802 and their removal through biological treatment followed by ozonation. *Water Research* 44 (2),  
803 578-588. <https://doi.org/10.1016/j.watres.2009.07.004>.

804 Roth, F.J., Sallman, B., Blank, H., 1959. In vitro studies of the antifungal antibiotic  
805 griseofulvin. *Journal of Investigative Dermatology* 33 (6), 403-418.  
806 <http://dx.doi.org/10.1038/jid.1959.164>.

807 Saha, A.K., Sultana, N., Mohanta, M.K., Abul Mandal, Haque, M.D. 2017. Identification  
808 and characterization of azo dye decolourising bacterial strains, *A. faecalis* E5.Cd and *A. faecalis*  
809 Fal.3 isolated from textile effluents. *American Scientific Research Journal for Engineering,*  
810 *Technology, and Sciences* 31 (1), 163-175.

811 Salgot, M., Huertas, E., Weber, S., Dott, W., Hollender, J., 2006. Wastewater reuse and risk:  
812 definition of key objectives. *Desalination* 187 (1-3), 29-40.  
813 <https://doi.org/10.1016/j.desal.2005.04.065>.

814 Schroll, G., Busse, H., Busse, H., Parrer, G., Rolleke, S., Lubitz, W., Denner, E.B.M., 2001.  
815 *Alcaligenes faecalis* subsp. *parafaecalis* subsp. nov., a bacterium accumulating Poly- $\beta$ -  
816 hydroxybutyrate from acetone-butanol bioprocess Residues. *Systematic and Applied*  
817 *Microbiology* 24 (1), 37-43. <https://doi.org/10.1078/0723-2020-00001>.

818 Shukor, M.Y., Gusmanizar, N., Azmi, N.A., Hamid, M., Ramli, J., Shamaan, N.A., Syed,  
819 M.A., 2009. Isolation and characterization of an acrylamide-degrading *B. cereus*. *J. Environ. Biol.*  
820 30 (1), 57-64.

821 Shomar, B., Darwish, K., Vincent, A., 2020. Optimization of wastewater treatment  
822 processes using molecular bacteriology. *Journal of Water Process Engineering* 33 (1), 1-8.  
823 <https://doi.org/10.1016/j.jwpe.2019.101030>.

824 Silberstein, S.D., McCrory, D.C., 2001. Butalbital in the treatment of headache: history,  
825 pharmacology, and efficacy. *Headache* 41 (10), 953-67. [https://doi.org/10.1046/j.1526-](https://doi.org/10.1046/j.1526-4610.2001.01189.x)  
826 [4610.2001.01189.x](https://doi.org/10.1046/j.1526-4610.2001.01189.x).

827 Sivaprakasam, S., Mahadevan, S., Sekar, S., Rajakumar, S., 2008. Biological treatment of  
828 tannery wastewater by using salt-tolerant bacterial strains. *Microb Cell Fact* 7 (15), 1-7.  
829 <https://doi.org/10.1186/1475-2859-7-15>.

830 Steenbergen, F.V., Oliemans, W., 2002. A review of policies in groundwater management  
831 in Pakistan 1950–2000. *Water Policy* 4 (4), 323-344. [https://doi.org/10.1016/S1366-](https://doi.org/10.1016/S1366-7017(02)00006-5)  
832 [7017\(02\)00006-5](https://doi.org/10.1016/S1366-7017(02)00006-5).

833 Sugimoto, M., Uchida, I., Mashimo, T., 2003. Local anaesthetics have different mechanisms  
834 and sites of action at the recombinant N-methyl-D-aspartate (NMDA) receptors. *Br J Pharmacol*.  
835 138 (5), 876–82. <https://doi.org/10.1038/sj.bjp.0705107>.

836 Suksaroj, C., Heran, M., Allegre, C., Persin, F., 2005. Treatment of textile plant effluent by  
837 nanofiltration and/or reverse osmosis for water reuse. *Desalination* 178 (1–3), 333-341.  
838 <https://doi.org/10.1016/j.desal.2004.11.043>.

839 Sulistinah, N., Munander, H., Sunarko, B., 2019. A new indigenous cyanomethane-  
840 degrading bacterium isolated from gold mining waste water. *Jurnal Biologi Indonesia* 15 (2), 131-  
841 139. <http://dx.doi.org/10.14203/jbi.v15i2.3807>.

842 Suyamud, B., Thiravetyan, P., Gadd, G.M., Panyapinyopol, B., Inthorn, D., 2020. Bisphenol  
843 A removal from a plastic industry wastewater by *Dracaena sanderiana* endophytic bacteria and  
844 *B. cereus* NI. *International Journal of Phytoremediation* 22 (2), 167-175.  
845 <https://doi.org/10.1080/15226514.2019.1652563>.

846 Syed, S., Chinthala, P., 2015. Heavy metal detoxification by different *Bacillus* species

- 847 isolated from Solar Salterns. Hindawi 2015 (1), 1-8. <https://doi.org/10.1155/2015/319760>.
- 848 Tahrani, L., Soufi, L., Mehri, I., Najjari, A., Hassan, A., Loco, J.V., Reynolds, T., Cherif, A.,  
849 Mansour, H.B., 2015. Isolation and characterization of antibiotic-resistant bacteria from  
850 pharmaceutical industrial wastewaters. *Microbial Pathogenesis* 89 (1), 54-61.  
851 <https://doi.org/10.1016/j.micpath.2015.09.001>.
- 852 Taran, M., Sisakhtnezhad, S., Azin, T., 2007. Biological removal of nickel (II) by *Bacillus*  
853 *sp.* KL1 in different conditions: optimization by Taguchi statistical approach. *Polish Journal of*  
854 *Chemical Technology* 17 (3), 29-32. <https://doi.org/10.1515/pjct-2015-0046>.
- 855 Tauzin-Fin, P., Bernard, O., Sesay, M., Biais, M., Richebe, P., Quinart, A., Revel, P., Sztark,  
856 F., 2014. Benefits of intravenous lidocaine on post-operative pain and acute rehabilitation after  
857 laparoscopic nephrectomy. *Journal of anaesthesiology, clinical pharmacology* 30(3), 366–372.  
858 <https://doi.org/10.4103/0970-9185.137269>.
- 859 Topal, E.I.A., Topal, M., Öbek, E., 2020. Assessment of heavy metal accumulations and  
860 health risk potentials in tomatoes grown in the discharge area of a municipal wastewater treatment  
861 plant. *International Journal of Environmental Health Research* (1), 1-14.  
862 <https://doi.org/10.1080/09603123.2020.1762071>.
- 863 Verma, A.K., Dash, R.R., Bhunia, P., 2012. A review on chemical coagulation/flocculation  
864 technologies for removal of colour from textile wastewaters. *Journal of Environmental*  
865 *Management* 93 (1), 154-168. <https://doi.org/10.1016/j.jenvman.2011.09.012>.
- 866 Verma, T., Srinath, T., Gadpayle, R.U., Ramteke, P.W., Hans, R.K., Garg, S.K., 2001.  
867 Chromate tolerant bacteria isolated from tannery effluent. *Bioresource Technology* 78 (1), 31-35.  
868 [https://doi.org/10.1016/S0960-8524\(00\)00168-1](https://doi.org/10.1016/S0960-8524(00)00168-1).
- 869 Wagan, F.H., Khoso, S., 2013. Water shortage; its causes, impacts and remedial measures.

870 6<sup>th</sup> International Civil Engineering Congress.

871 [https://scholar.google.com.pk/scholar?hl=en&as\\_sdt=0%2C5&q=khoso+2013+water+shortage&](https://scholar.google.com.pk/scholar?hl=en&as_sdt=0%2C5&q=khoso+2013+water+shortage&btnG=)

872 [btnG=](https://scholar.google.com.pk/scholar?hl=en&as_sdt=0%2C5&q=khoso+2013+water+shortage&btnG=).

873 Wojcieszynska, D., Domaradzka, D., Hupert-Kocurek, K., Guzik, U., 2014. Bacterial  
874 degradation of naproxen – Undisclosed pollutant in the environment. Journal of Environmental  
875 Management 145, 157-161. <https://doi.org/10.1016/j.jenvman.2014.06.023>.

876 World Resource Institute (WRI), 2015. Ranking the world's most water-stressed countries  
877 in 2040. <https://www.wri.org/blog/2015/08/ranking-world-s-most-water-stressed-countries-2040>.

878 Wu, C.F., Xu, X.M., Zhu, Q., Deng, M.C., Feng, L., Peng, J., Yuan, J.P., Wang, J.H., 2014.  
879 An effective method for the detoxification of cyanide-rich wastewater by *Bacillus* sp. CN-22.  
880 Applied microbiology and biotechnology 98 (8), 3801-3807. [https://doi.org/10.1007/s00253-013-](https://doi.org/10.1007/s00253-013-5433-5)  
881 [5433-5](https://doi.org/10.1007/s00253-013-5433-5).

882 Yamina, B., Tahar, B., Lila, M., Hocine, H., Laure, F.M., 2014. Study on Cadmium  
883 resistant-bacteria isolated from hospital wastewaters. Advances in Bioscience and Biotechnology  
884 5 (8), 1-9. <https://doi.org/10.4236/abb.2014.58085>.

885 Yokoyama, S.I., Adachi, Y., Asakura, S., Kohyama, E., 2013. Characterization of  
886 *Alcaligenes faecalis* strain AD15 indicating biocontrol activity against plant pathogens. The  
887 Journal of general and applied microbiology 59(2), 89-95. <https://doi.org/10.2323/jgam.59.089>.

888 Zhang, X., Wang, T., Xu, Z., Zhang, L., Dai, Y., Tang, X., Tao, R., Li, R., Yang, Y., Tai,  
889 Y., 2020. Effect of heavy metals in mixed domestic-industrial wastewater on performance of

890 recirculating standing hybrid constructed wetlands (RSHCWs) and their removal. Chemical  
891 Engineering Journal 379 (1), 122363. <https://doi.org/10.1016/j.cej.2019.122363>.

892 Zhang, H., Gao, S., Lercher, M.J., Hu, S., Chen, W., 2012. EvolView, an online tool for  
893 visualizing, annotating and managing phylogenetic trees. Nucleic Acids Research 40 (W1),  
894 W569–W572. <https://doi.org/10.1093/nar/gks576>.

895 Zhang, M., Chen, W., Chen, B., Chang, C., Hsueh, C., Ding, Y., Lin, K., Xu, H., 2010.  
896 Comparative study on characteristics of azo dye decolorization by indigenous decolorizers.  
897 Bioresource Technology 101 (8), 2651-2656. <https://doi.org/10.1016/j.biortech.2009.10.070>.

898 Zoqi, M.J., Doosti, M.R., 2020. Study of heavy metal accumulation in plants irrigated with  
899 well water and wastewater from birjand wastewater plant. Journal of Environmental Health  
900 Engineering 7 (2), 135-151. <http://jehe.abzums.ac.ir/article-1-740-en.html>.



901 **Table 1: Physiochemical characterisation of untreated and treated wastewaters in**  
 902 **comparison to NEQS**

| Parameters              | NEQS                  | Wastewaters |            |              |            |               |            |             |            |           |            |    |
|-------------------------|-----------------------|-------------|------------|--------------|------------|---------------|------------|-------------|------------|-----------|------------|----|
|                         |                       | DWW         |            | HWW          |            | TWW           |            | PWW         |            | MWW       |            |    |
|                         |                       | Untreated   | Treated    | Untreated    | Treated    | Untreated     | Treated    | Untreated   | Treated    | Untreated | Treated    |    |
| Colour (PCU)            | -                     | Light grey  | Colourless | Light yellow | Colourless | Greenish grey | Colourless | Light brown | Colourless | Blackish  | Colourless |    |
|                         | -                     | 101         | 28         | 188          | 55         | 221           | 61         | 103         | 38         | 311       | 64         |    |
| Smell                   | Acceptable / Bearable | Pungent     | No smell   | Fishy        | No smell   | Pungent       | No smell   | Fishy       | No smell   | Pungent   | No smell   |    |
| Temperature (°C)        | ≤3°C                  | -           | 25         | 4            | 25         | 4             | 22         | 4           | 28         | 4         | 21         | 4  |
|                         | -                     | -           | 29         | 26           | 30         | 26            | 33         | 26          | 33         | 26        | 31         | 26 |
| pH                      | 6.6-8.5               | 7.8         | 6.9        | 7.4          | 6.7        | 8.7           | 7.5        | 10.4        | 8.2        | 8.4       | 7.4        |    |
| EC (µs/cm)              | -                     | 413         | 214        | 444          | 267        | 861           | 574        | 350         | 193        | 775       | 435        |    |
| TSS (mg/L)              | <500 mg/L             | 1920        | 363        | 2300         | 483        | 2150          | 425        | 2120        | 398        | 2670      | 491        |    |
| TDS (mg/L)              | 1000                  | 296         | 213        | 296          | 220        | 608           | 398        | 105         | 87         | 541       | 323        |    |
| COD (mg/L)              | 150-400               | 76          | 212        | 260          | 396        | 17            | 153        | 133         | 269        | 99        | 235        |    |
| BOD <sub>5</sub> (mg/L) | 80-250                | 39          | 176        | 78           | 246        | 14            | 174        | 68          | 223        | 40        | 169        |    |
| BOD <sub>5</sub> : COD  | >0.6                  | 0.51        | 0.83       | 0.3          | 0.62       | 0.82          | 1.14       | 0.51        | 0.83       | 0.4       | 0.72       |    |
| Salinity (ppt)          | -                     | 0.2         | 0.1        | 0.2          | 0.1        | 0.5           | 0.3        | 0.3         | 0.2        | 0.4       | 0.3        |    |
| Turbidity (NTU)         | 5                     | 38          | 4          | 51           | 5          | 76            | 5          | 61          | 3          | 123       | 4          |    |
| Arsenic (As)            | 0.05 mg/L             | Nd          | Nd         | Nd           | Nd         | Nd            | Nd         | Nd          | Nd         | Nd        | Nd         |    |
| Cadmium (Cd)            | 0.01 mg/L             | Nd          | Nd         | Nd           | Nd         | Nd            | Nd         | Nd          | Nd         | Nd        | Nd         |    |
| Chromium (Cr)           | 0.05 mg/L             | Nd          | Nd         | 1.8          | Nd         | Nd            | Nd         | 1.7         | 0.05       | 0.9       | 0.02       |    |
| Lead (Pb)               | 0.05 mg/L             | Nd          | Nd         | 0.17         | Nd         | Nd            | Nd         | Nd          | Nd         | Nd        | Nd         |    |
| Nickel (Ni)             | 0.02 mg/L             | 0.08        | 0.07       | 1.8          | 0.25       | 0.18          | 0.08       | 1.0         | 0.5        | 0.5       | 0.22       |    |

903 \*NEQS = National Environment Quality Standards  
 904 \*Nd = Not Detectable  
 905 \*DWW = Domestic Wastewater  
 906 \*HWW = Hospital Wastewater  
 907 \*TWW = Textile Wastewater  
 908 \*PWW = Pharmaceutical Wastewater  
 909 \*MWW = Mixed Wastewater

910

**Table 2: Analysis of untreated and treated hospital wastewater through GCMS**

| Wastewater samples             | Pollutants                   | Major Group/Class | Chemical structure                                                                  | Retention time (min) | Confirmation ion (m/z) | Conc. (ppm)  |
|--------------------------------|------------------------------|-------------------|-------------------------------------------------------------------------------------|----------------------|------------------------|--------------|
| <b>Untreated HWW (Control)</b> |                              |                   |                                                                                     |                      |                        |              |
|                                | Phenol                       | Aromatic          |    | 26.72                | 58.15                  | 0.876        |
|                                | Salicylic acid               | Metabolite        |    | 6.51                 | 147.64                 | 0.048        |
|                                | Caffeine                     | Stimulant         |    | 7.96                 | 266.82                 | 0.007        |
|                                | Naproxen                     | NSAID             |    | 9.16                 | 412.07                 | 0.023        |
|                                | Octadecene                   | Organic           |    | 28.65                | 581.46                 | 0.185        |
|                                | Diazepam                     | Sedative          |   | 38.06                | 685.39                 | 0.014        |
| <b>Treated HWW (D6)</b>        |                              |                   |                                                                                     |                      |                        |              |
|                                | Salicylic acid               | Metabolite        |  | 6.51                 | 147.64                 | 0.007        |
|                                | Caffeine                     | Stimulant         |  | 7.96                 | 266.82                 | 0.004        |
|                                | Ticlopidine<br>(Derivative)  | Fibrinolytic      |  | 31.95                | 534.12                 | 0.011        |
| <b>Treated HWW (D7)</b>        |                              |                   |                                                                                     |                      |                        |              |
|                                | Tetradecene<br>(Derivative)  | Organic           |  | 7.08                 | 190.86                 | 0.035        |
|                                | Naproxen                     | NSAID             |  | 9.16                 | 412.07                 | 0.006        |
|                                | Octadecene                   | Organic           |  | 28.65                | 581.46                 | 0.019        |
|                                | Griseofulvin<br>(Derivative) | Antibacterial     |  | 46.18                | 692.95                 | 0.028        |
| <b>Treated HWW (P1)</b>        |                              |                   |                                                                                     |                      |                        |              |
|                                | Phenol                       | Aromatic          |  | 26.72                | 58.15                  | <b>0.381</b> |
|                                | Salicylic acid               | Metabolite        |  | 6.51                 | 147.64                 | <b>0.015</b> |

|                            |             |                                                                                   |       |        |           |
|----------------------------|-------------|-----------------------------------------------------------------------------------|-------|--------|-----------|
| Lidocaine<br>(Derivative)  | Anesthetic  | 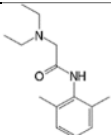 | 20.26 | 368.28 | 0.122     |
| Butalbital<br>(Derivative) | Barbiturate |  | 30.88 | 625.51 | 0.054     |
| <b>Internal standards</b>  |             |                                                                                   |       |        |           |
| Acenaphthene               | <i>Na</i>   |  | 24.27 | 156.18 | <i>Na</i> |
| Phenanthrene               | <i>Na</i>   |  | 29.74 | 184.25 | <i>Na</i> |

911

912

913

**Table 3. Top 10 BLAST hits for isolate D6**

| Hit Number | Description                                                                                   | Max Score | Total Score | Query Cover | Percentage Identity | Accession number |
|------------|-----------------------------------------------------------------------------------------------|-----------|-------------|-------------|---------------------|------------------|
| 1.         | <i>Bacillus paramycoides</i><br>strain MCCC 1A04098 16S<br>ribosomal RNA, partial sequence    | 2743      | 2743        | 100%        | 100.00%             | NR_157734.1      |
| 2.         | <i>Bacillus tropicus</i><br>strain MCCC 1A01406 16S<br>ribosomal RNA, partial sequence        | 2737      | 2737        | 100%        | 99.93%              | NR_157736.1      |
| 3.         | <i>Bacillus nitratireducens</i><br>strain MCCC 1A00732 16S<br>ribosomal RNA, partial sequence | 2737      | 2737        | 100%        | 99.93%              | NR_157732.1      |
| 4.         | <i>Bacillus luti</i><br>strain MCCC 1A00359 16S<br>ribosomal RNA, partial sequence            | 2737      | 2737        | 100%        | 99.93%              | NR_157730.1      |
| 5.         | <i>Bacillus albus</i><br>strain MCCC 1A02146 16S<br>ribosomal RNA, partial sequence           | 2737      | 2737        | 100%        | 99.93%              | NR_157729.1      |
| 6.         | <i>Bacillus cereus</i><br>strain CCM 2010 16S ribosomal<br>RNA, partial sequence              | 2732      | 2732        | 100%        | 99.87%              | NR_115714.1      |
| 7.         | <i>Bacillus cereus</i><br>ATCC 14579 16S ribosomal RNA<br>(rrnA), partial sequence            | 2732      | 2732        | 100%        | 99.87%              | NR_074540.1      |
| 8.         | <i>Bacillus proteolyticus</i><br>strain MCCC 1A00365 16S<br>ribosomal RNA, partial sequence   | 2726      | 2726        | 100%        | 99.80%              | NR_157735.1      |
| 9.         | <i>Bacillus cereus</i><br>strain IAM 12605 16S ribosomal<br>RNA, partial sequence             | 2721      | 2721        | 99%         | 99.86%              | NR_115526.1      |
| 10.        | <i>Bacillus wiedmannii</i><br>strain FSL W8-0169 16S<br>ribosomal RNA, partial sequence       | 2721      | 2721        | 100%        | 99.73%              | NR_152692.1      |

914

915

916

917

918

919

920

921

**Table 4. Top 10 BLAST hits for isolate D7**

| Hit Number | Description                                                                             | Max Score | Total Score | Query Cover | Percentage Identity | Accession number |
|------------|-----------------------------------------------------------------------------------------|-----------|-------------|-------------|---------------------|------------------|
| 1.         | <i>Bacillus paramycoides</i> strain MCCC 1A04098 16S ribosomal RNA, partial sequence    | 2715      | 2715        | 100%        | 99.86%              | NR_157734.1      |
| 2.         | <i>Bacillus tropicus</i> strain MCCC 1A01406 16S ribosomal RNA, partial sequence        | 2710      | 2710        | 100%        | 99.80%              | NR_157736.1      |
| 3.         | <i>Bacillus nitratireducens</i> strain MCCC 1A00732 16S ribosomal RNA, partial sequence | 2710      | 2710        | 100%        | 99.80%              | NR_157732.1      |
| 4.         | <i>Bacillus luti</i> strain MCCC 1A00359 16S ribosomal RNA, partial sequence            | 2710      | 2710        | 100%        | 99.80%              | NR_157730.1      |
| 5.         | <i>Bacillus albus</i> strain MCCC 1A02146 16S ribosomal RNA, partial sequence           | 2710      | 2710        | 100%        | 99.80%              | NR_157729.1      |
| 6.         | <i>Bacillus cereus</i> strain CCM 2010 16S ribosomal RNA, partial sequence              | 2704      | 2704        | 100%        | 99.73%              | NR_115714.1      |
| 7.         | <i>Bacillus cereus</i> ATCC 14579 16S ribosomal RNA ( <i>rrnA</i> ), partial sequence   | 2704      | 2704        | 100%        | 99.73%              | NR_074540.1      |
| 8.         | <i>Bacillus cereus</i> strain IAM 12605 16S ribosomal RNA, partial sequence             | 2702      | 2702        | 99%         | 99.86%              | NR_115526.1      |
| 9.         | <i>Bacillus cereus</i> strain NBRC 15305 16S ribosomal RNA, partial sequence            | 2702      | 2702        | 99%         | 99.86%              | NR_112630.1      |
| 10.        | <i>Bacillus cereus</i> strain JCM 2152 16S ribosomal RNA, partial sequence              | 2702      | 2702        | 99%         | 99.86%              | NR_113266.1      |

922

923

924

925

926

927

928

929

930

**Table 5. P1 Isolate Top 10 Blast hits**

| Hit Number | Description                                                                                         | Max Score | Total Score | Query Cover | Percentage Identity | Accession number |
|------------|-----------------------------------------------------------------------------------------------------|-----------|-------------|-------------|---------------------|------------------|
| 1.         | <i>Alcaligenes faecalis</i> strain NBRC 13111 16S ribosomal RNA, partial sequence                   | 2473      | 2473        | 99%         | 97.47%              | NR_113606.1      |
| 2.         | <i>Alcaligenes aquatilis</i> strain LMG 22996 16S ribosomal RNA, partial sequence                   | 2455      | 2455        | 99%         | 97.20%              | NR_104977.1      |
| 3.         | <i>Alcaligenes faecalis</i> strain IAM 12369 16S ribosomal RNA, partial sequence                    | 2429      | 2429        | 99%         | 96.99%              | NR_043445.1      |
| 4.         | <i>Alcaligenes endophyticus</i> strain AER10 16S ribosomal RNA, partial sequence                    | 2388      | 2388        | 100%        | 96.39%              | NR_156855.1      |
| 5.         | <i>Alcaligenes faecalis</i> subsp. <i>parafaecalis</i> strain G 16S ribosomal RNA, partial sequence | 2364      | 2364        | 96%         | 97.17%              | NR_025357.1      |
| 6.         | <i>Alcaligenes pakistanensis</i> strain NCCP-650 16S ribosomal RNA, partial sequence                | 2320      | 2320        | 96%         | 96.67%              | NR_145932.1      |
| 7.         | <i>Alcaligenes faecalis</i> subsp. <i>phenolicus</i> strain J 16S ribosomal RNA, partial sequence   | 2303      | 2303        | 99%         | 95.25%              | NR_042830.1      |
| 8.         | <i>Paenalcaligenes suwonensis</i> strain ABC02-12 16S ribosomal RNA, partial sequence               | 2204      | 2204        | 97%         | 94.76%              | NR_133804.1      |
| 9.         | <i>Parapusillimonas granuli</i> strain Ch07 16S ribosomal RNA, partial sequence                     | 2200      | 2200        | 99%         | 94.36%              | NR_115804.1      |
| 10.        | <i>Pusillimonas ginsengisoli</i> strain DCY25 16S ribosomal RNA, partial sequence                   | 2200      | 2200        | 100%        | 94.07%              | NR_116103.1      |

931

932

933

934

935

936

937



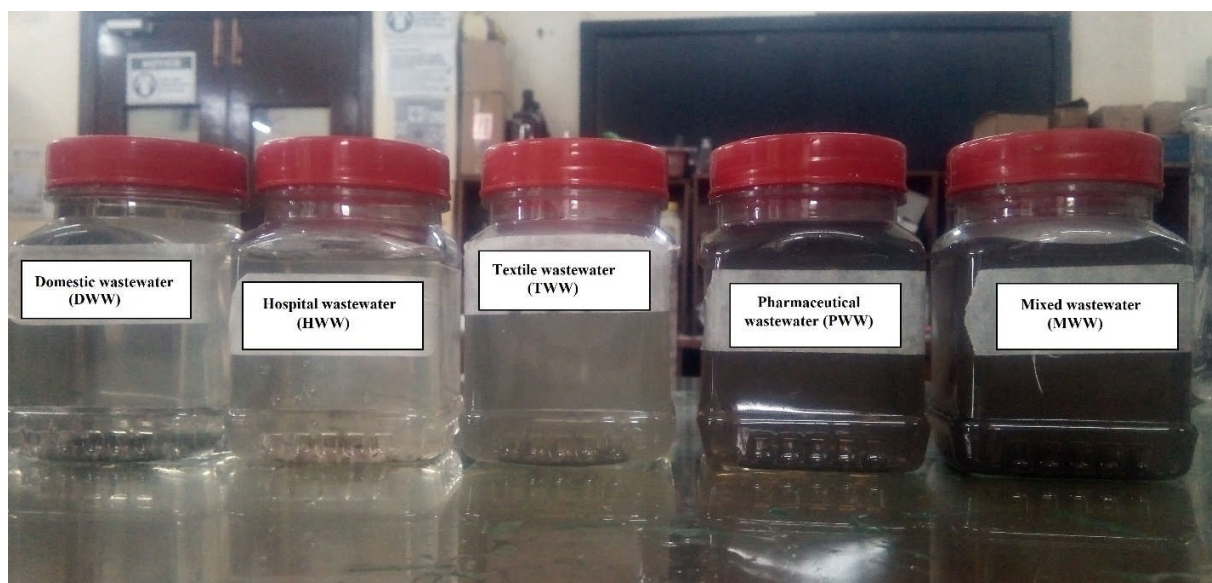

938

939

(a) Untreated wastewaters

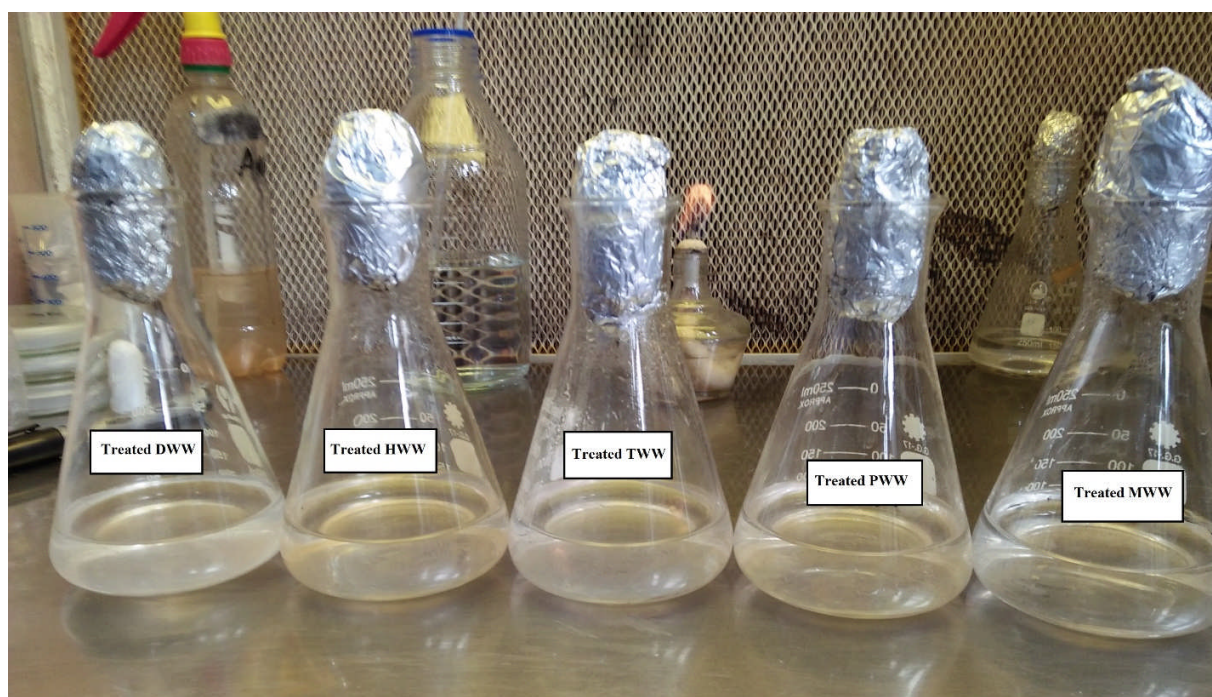

940

941

(b) Treated wastewaters

942

Figure 1: Comparison of wastewaters before and after decolourisation

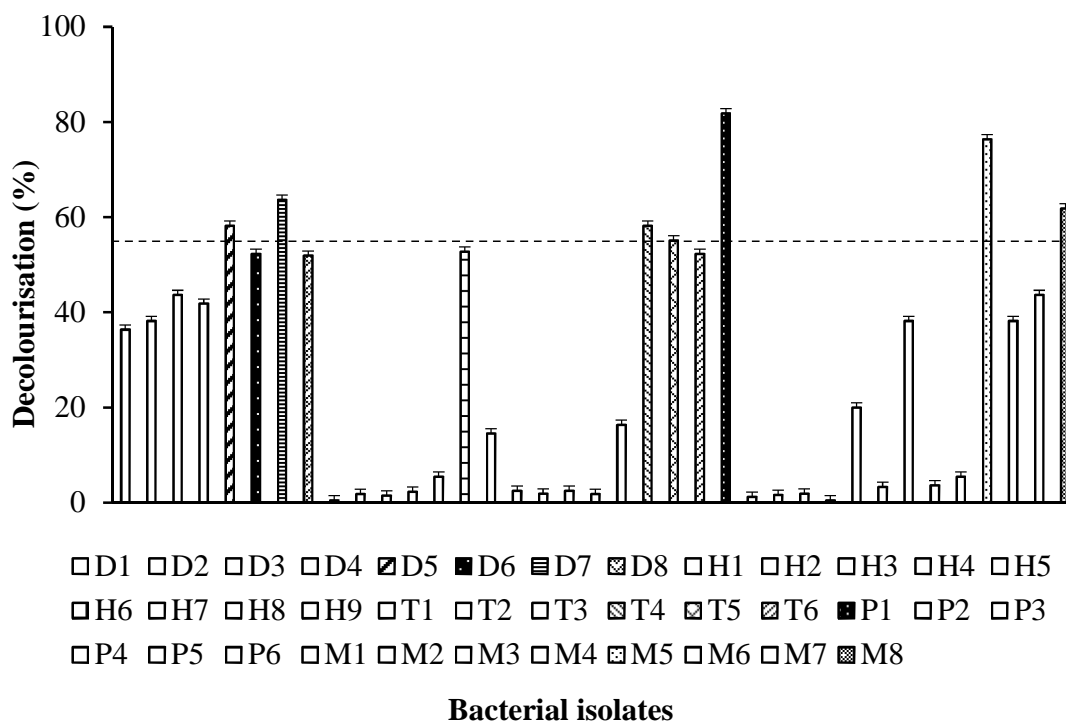

943

944 **Figure 2. Initial screening from 37 bacterial isolates (>50%); D1-D8 in domestic**  
 945 **wastewater, H1-H9 in hospital wastewater, T1-T6 in textile wastewater, P1-P6 in**  
 946 **pharmaceutical wastewater and M1-M8 in mixed wastewater**



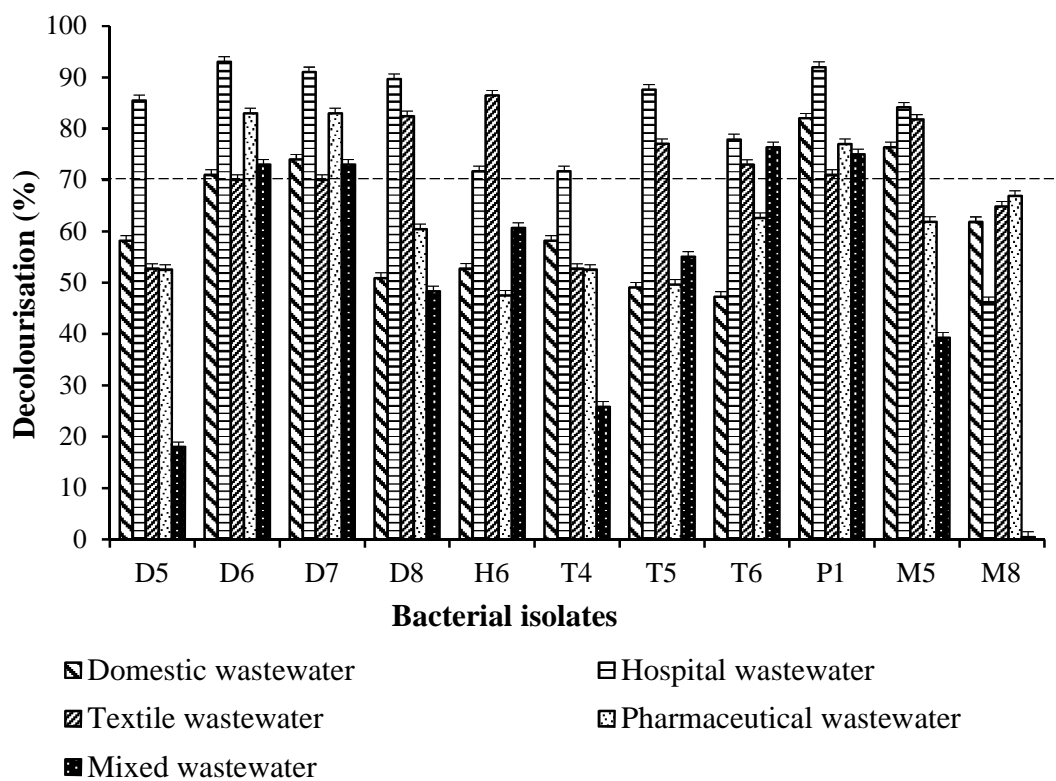

947

948 **Figure 3. Final screening from 11 bacterial isolates (>70%) against domestic,**  
949 **hospital, textile, pharmaceutical and mixed wastewaters**

950

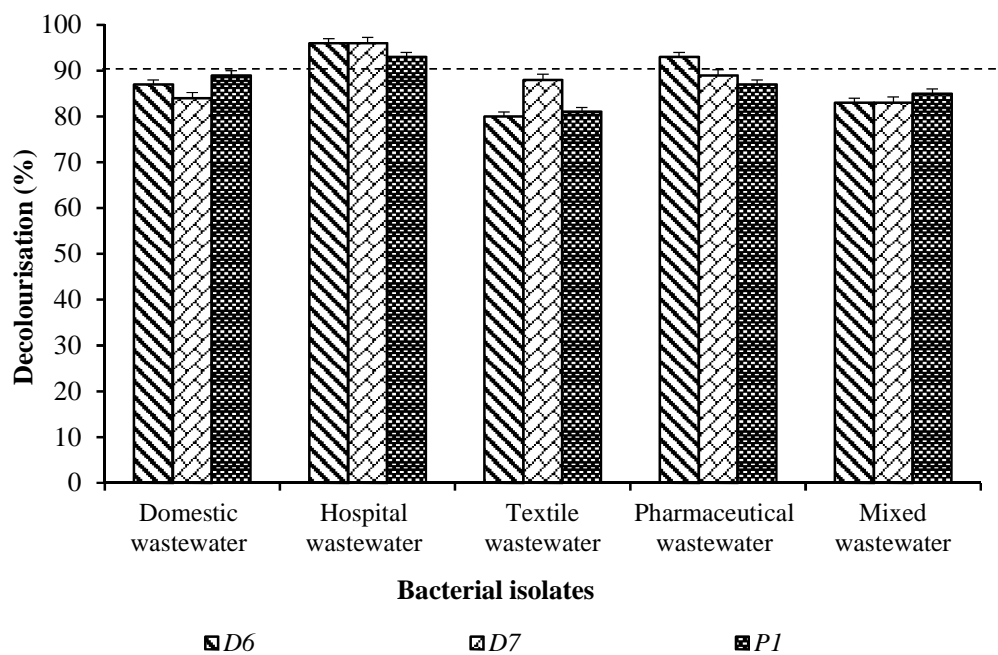

951

952 **Figure 4. Decolourisation of domestic, hospital, textile, pharmaceutical and mixed**

953

**wastewaters against D6, D7 and P1**

954

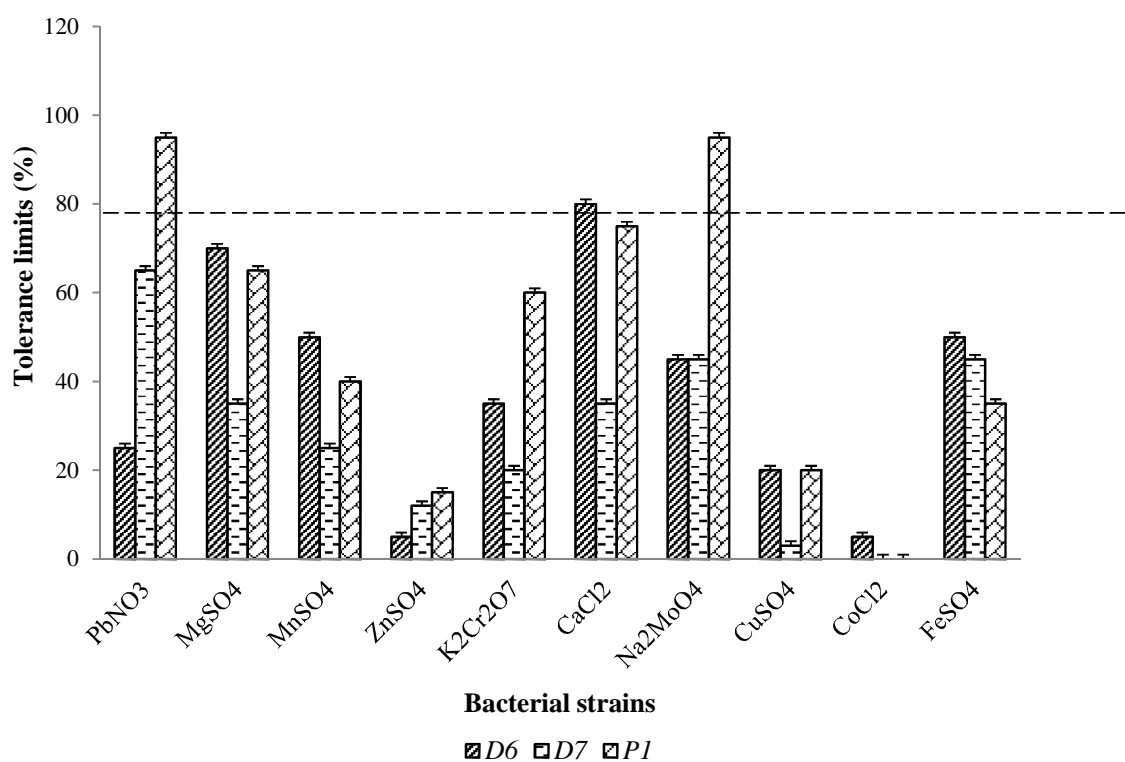

955

956

**Figure 5. Tolerance limits of bacterial isolates against metal salts (>65%)**

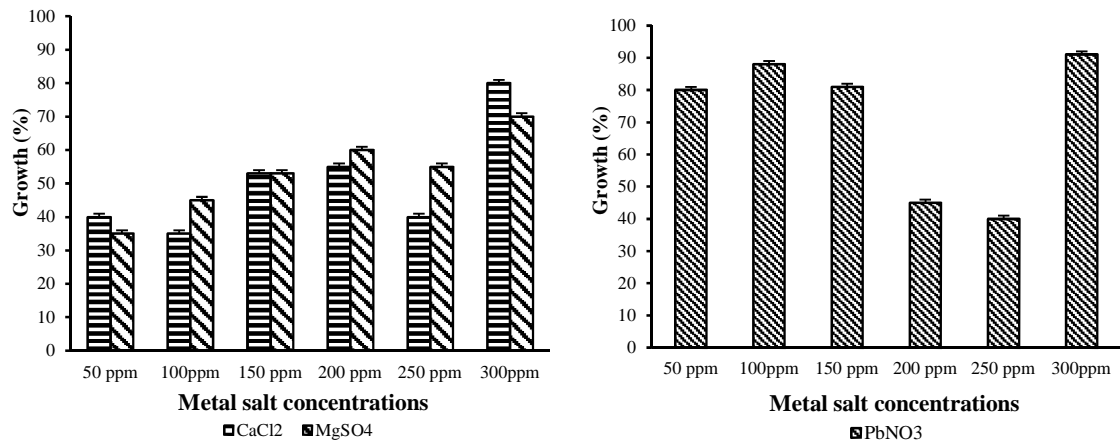

957

958

(a)

(b)

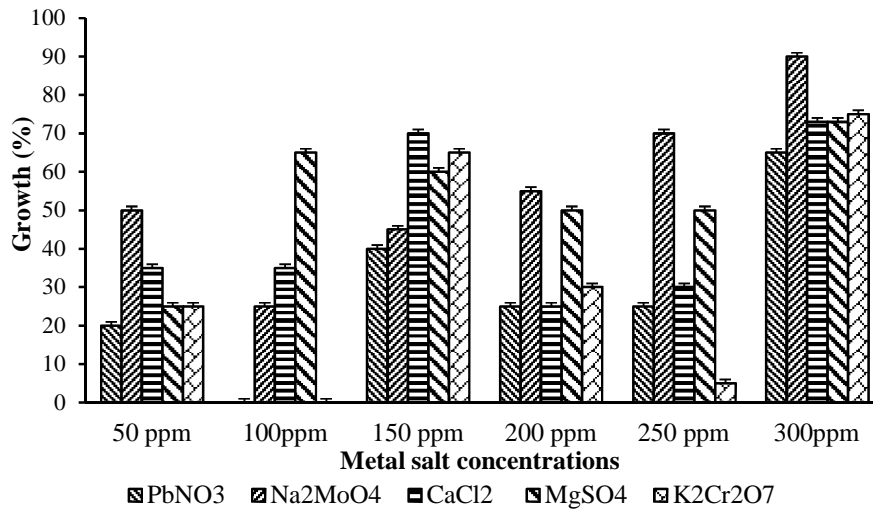

959

960

(c)

961

**Figure 6. Maximum tolerance limits of bacterial isolates to metals salts solutions at 50, 100, 150, 200, 250 and 300 ppm concentrations (a) D6, (b) D7, (c) P1**

962

963

964

965

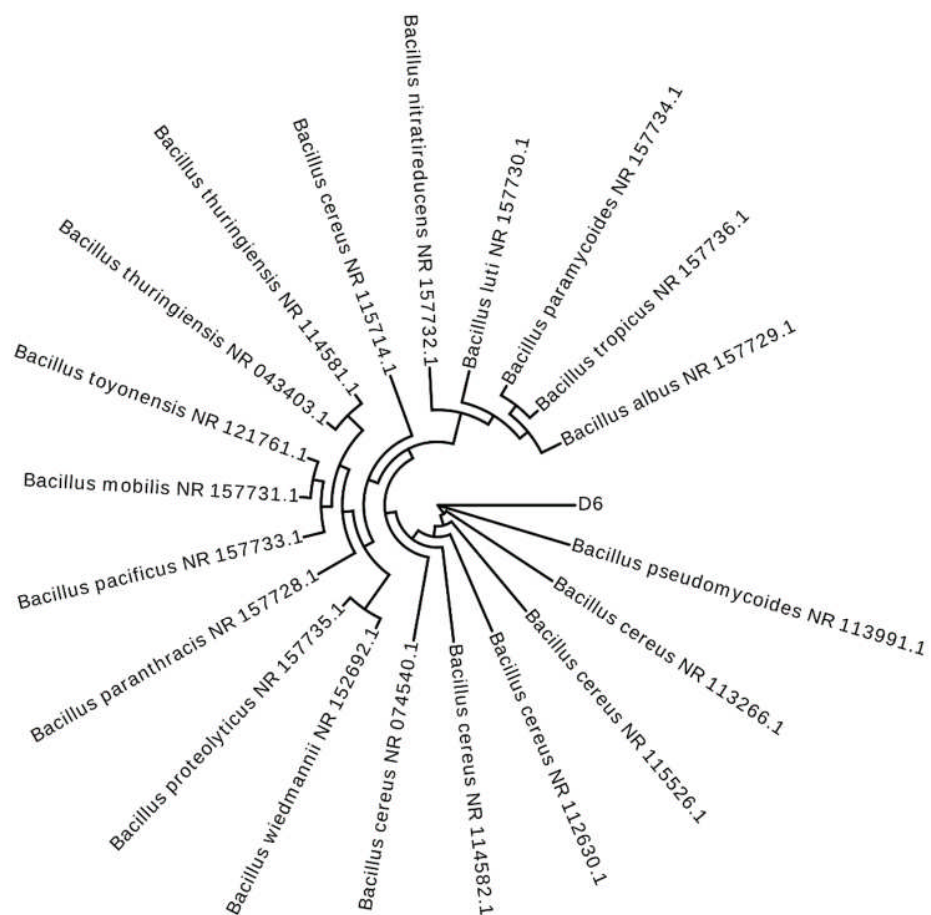

966

967

**Figure 7. Phylogenetic distance between D6 isolate and top 20 BLAST sequences**

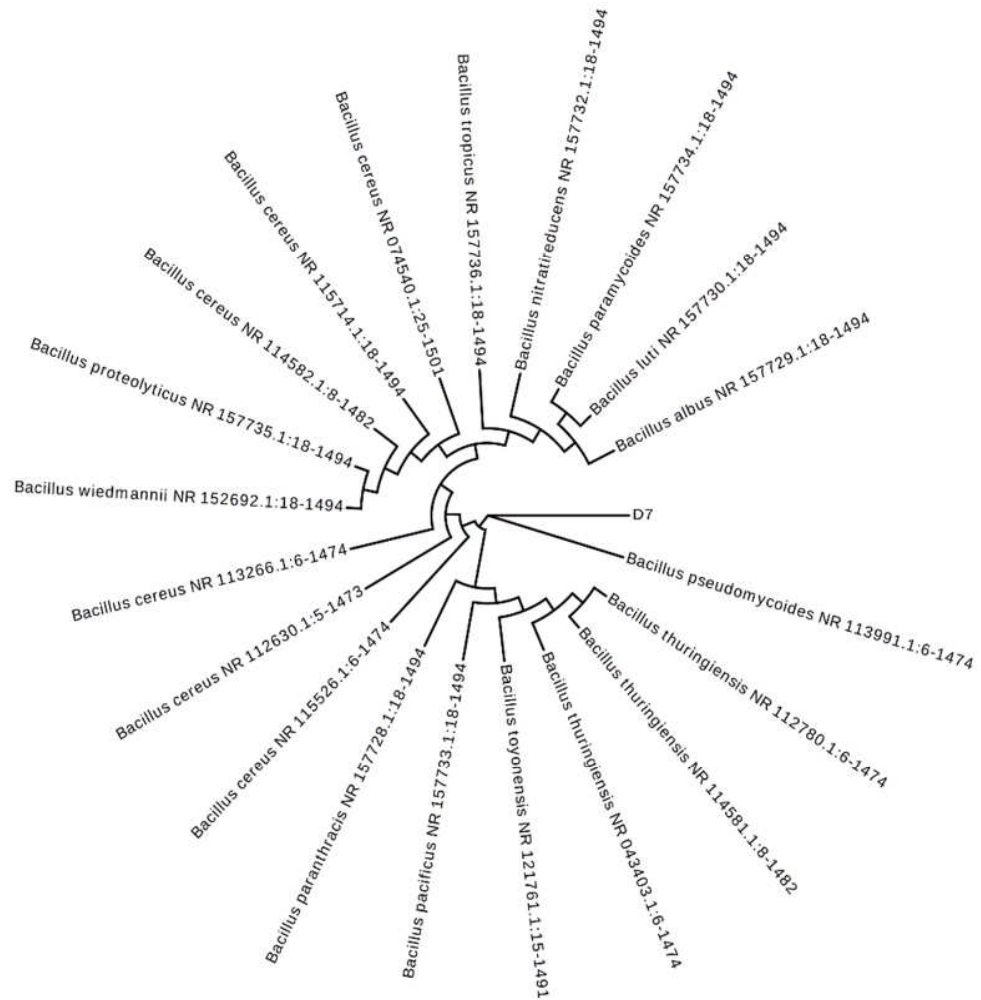

968

969

**Figure 8. Phylogenetic distance between D7 isolate and top 20 BLAST sequences**

970

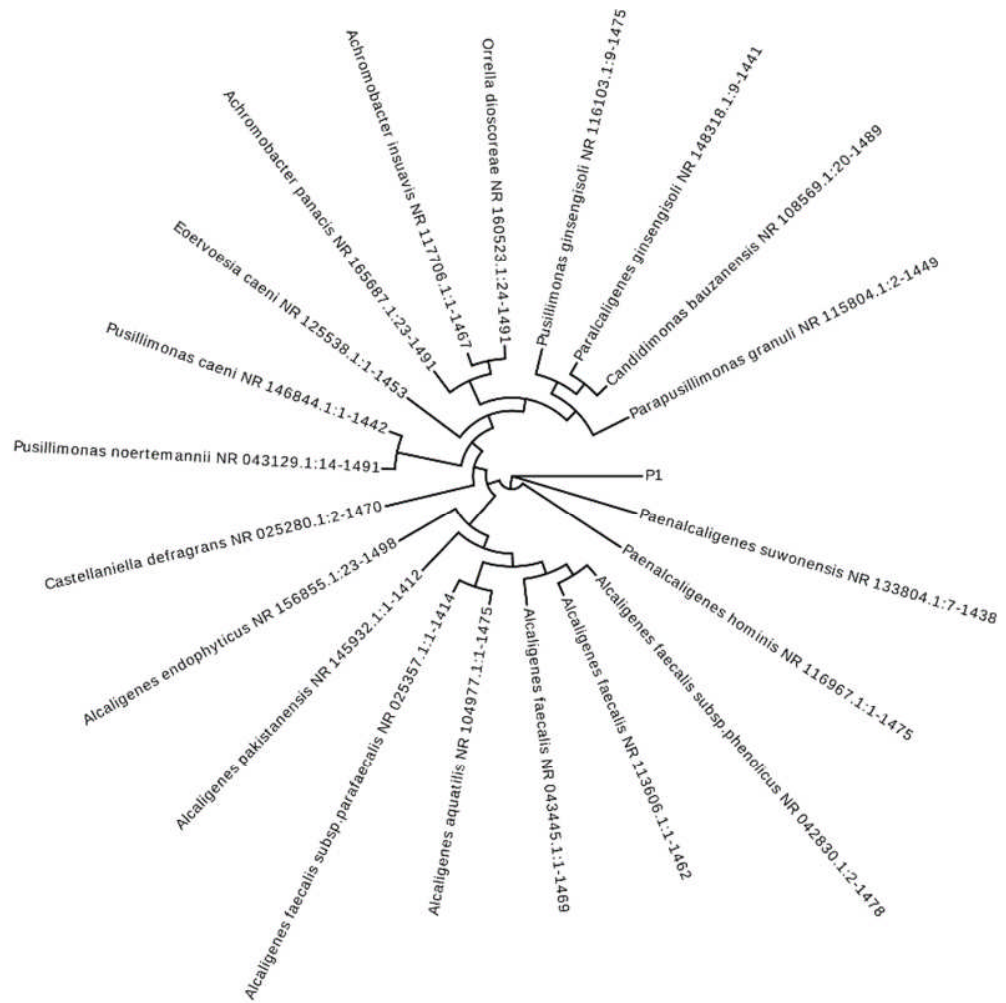

971

972

**Figure 9. Phylogenetic distance between P1 isolate and top 20 BLAST sequences**

973

974

975

976

977

978
